# Supplementary material for: Interactions of plutons and detachments, comparison of Aegean and Tyrrhenian granitoids
Source: Copernicus journal article supplement (doi:10.5194/se-2021-11), 2021-02-16
Supplement: Supplementary file [file se-2021-11-CC1-supplement.pdf]

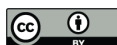

# 1 Interactions of plutons and detachments, 2 comparison of Aegean and Tyrrhenian granitoids 3 4

5 Laurent Jolivet <sup>1</sup>, Laurent Arbaret <sup>2,3,4</sup>, Laetitia Le Pourhiet <sup>1</sup>, Florent Cheval-  
6 Garabedian <sup>2,3,4</sup>, Vincent Roche <sup>1</sup>, Aurélien Rabillard <sup>2,3,4</sup>, Loïc Labrousse <sup>1</sup>  
7

8 <sup>1</sup> Sorbonne Université, CNRS-INSU, Institut des Sciences de la Terre Paris, IStEP UMR 7193, F-75005  
9 Paris, France

10 <sup>2</sup> Université d'Orléans, ISTO, UMR 7327, 45071, Orléans, France

11 <sup>3</sup> CNRS/INSU, ISTO, UMR 7327, 45071 Orléans, France

12 <sup>4</sup> BRGM, ISTO, UMR 7327, BP 36009, 45060 Orléans, France  
13

14 **Abstract:** Back-arc extension superimposed on mountain belts leads to distributed normal  
15 faults and shear zones, interacting with magma emplacement in the crust. The composition of  
16 granitic magmas emplaced at this stage often involves a component of crustal melting. The  
17 Miocene Aegean granitoids were emplaced in metamorphic core complexes (MCC) below  
18 crustal-scale low-angle extensional shear zones and normal faults. Intrusion in such contexts  
19 interacts with extension and shear along detachments, from the hot magmatic flow within the  
20 pluton root zone to the colder ductile and brittle deformation along the detachment. A  
21 comparison of the Aegean plutons with the Elba Island MCC in the back-arc region of the  
22 Apennines subduction shows that these processes are characteristic of pluton-detachment  
23 interactions in general and we discuss a conceptual emplacement scenario, tested by numerical  
24 models. Mafic injections within the partially molten lower crust above the hot asthenosphere  
25 trigger the ascent within the core of the MCC of felsic magmas, controlled by the strain  
26 localization on persistent crustal scale shear zones at the top that guide the ascent until the brittle  
27 ductile transition is reached during exhumation. Once the system definitely enters the brittle  
28 regime, the detachment and the upper crust are intruded while new detachments migrate upward  
29 and in the direction of shearing. Numerical models reproduce the geometry and the kinematic  
30 evolution deduced from field observations.  
31  
32  
33

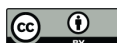

## 1. Introduction

In the deep parts of orogens, the flow of melts is coupled with ductile deformation and controlled by buoyancy and tectonic forces (Brown, 1994; Brown and Solar, 1998; Brown, 2007). Migmatites, which are weak crustal material as long as they are kept at high temperature, are the source of magmas that concentrate within plutons of various sizes. On the other hand, interactions between magmatism and lithospheric deformation, and more specifically interactions of plutons with crustal-scale tectonics, depend first of all upon the rate of magma production and, to a second order, strain rates. The rate of magma transfer to the crust is indeed so large compared to tectonic strain rates that the construction of plutons is thought in a first approach to be little influenced by the tectonic setting, especially when small plutons are concerned (de Saint Blanquat et al., 2011).

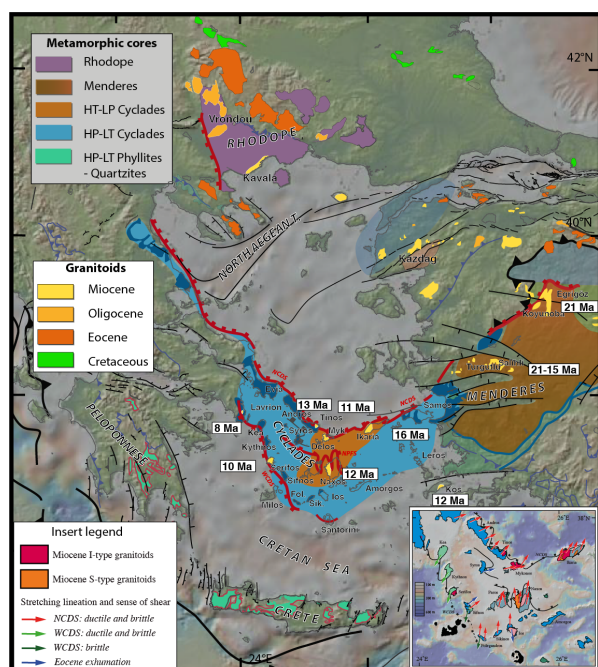

Figure 1: Tectonic map of the Aegean region showing the successive generations of granitoids since the late Cretaceous. Modified from Jolivet et al. (2015).

The Miocene Aegean plutons (figure 1), emplaced in an extensional context within metamorphic core complexes (MCCs), may however depart from this behaviour. Despite a moderate volume, they have indeed recorded the complete evolution from syn-tectonic magmatic flow to localized mylonitic deformation along the main detachment (Faure and Bonneau, 1988; Urai et al., 1990; Faure et al., 1991; Lee and Lister, 1992; Gautier et al., 1993;

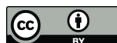

Laurent et al., 2015; Rabillard et al., 2015; Bessi re et al., 2017; Rabillard et al., 2018). All of them moreover show a systematic magmatic and tectonic evolution of the host MCCs with several magmatic pulses and a series of detachments forming sequentially during exhumation (Rabillard et al., 2018). Several of them also show an association of mixed or mingled felsic and mafic magmas, with an evolution from a significant component of crustal melting toward more mafic composition, a trend that is common in post-orogenic magmas (Bonin, 2004).

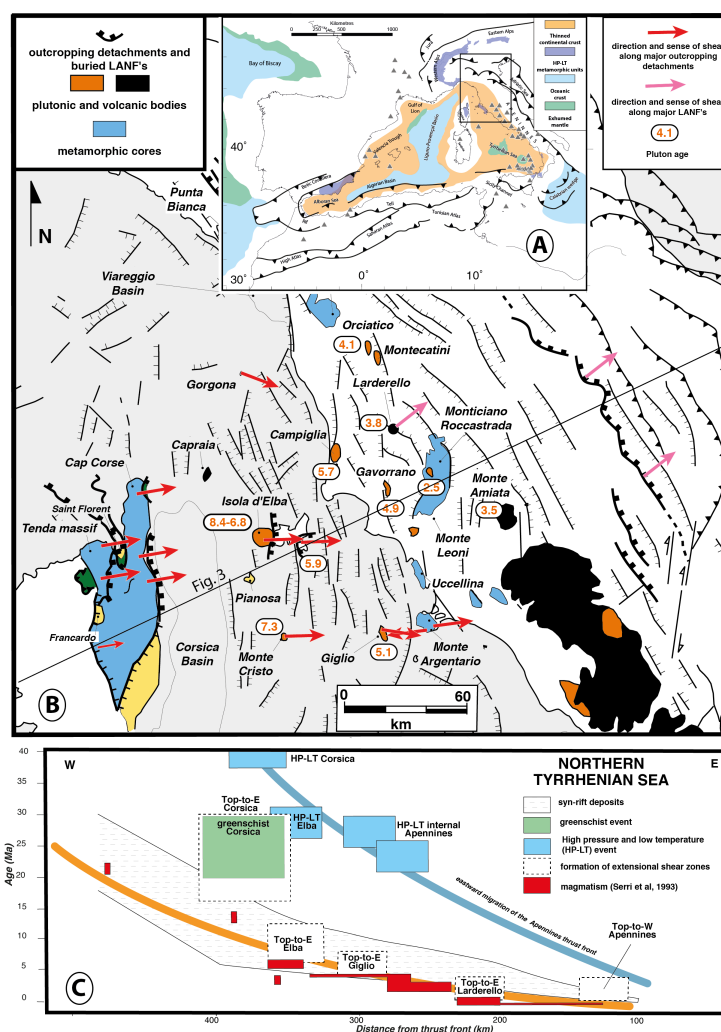

60

Figure 2: Tectonic map of the Central and Western Mediterranean with the distribution of recent magmatism (Savelli, 1988; Serri et al., 1993; Savelli, 2002b, a; Duggen et al., 2005; Avanzinelli et al., 2009; Savelli, 2015). Tectonic map (B) of the northern Tyrrhenian region and Northern Apennines and (C) a diagram showing the evolution of the ages of syn-rift basins, metamorphic events and magmatism along a cross-section from Corsica to the Apennines, modified from Jolivet et al. (1998).



Whether these features are characteristic of syn-extension plutons in post-orogenic back-arc environments is the question we address in this paper, through a comparison of the Aegean plutons with those of the northern Tyrrhenian Sea and Tuscany, with a focus on Elba Island in the Tuscan archipelago (figure 2). Striking similarities can indeed be observed between the two contexts in terms of tectonic and magmatic evolution. We propose and test a scenario of formation and emplacement of plutons in a back-arc post-orogenic context below crustal-scale detachments.

## 2. Geodynamic context

The Aegean and North Tyrrhenian granitoids were emplaced during the Miocene and part of the early Pliocene in the back-arc regions of the Hellenic and Apennines subduction, respectively (Serri et al., 1993; Jolivet et al., 1998; Pe-Piper and Piper, 2002, 2007; Avanzinelli et al., 2009; Jolivet et al., 2015; Rabillard et al., 2018) (figure 3).

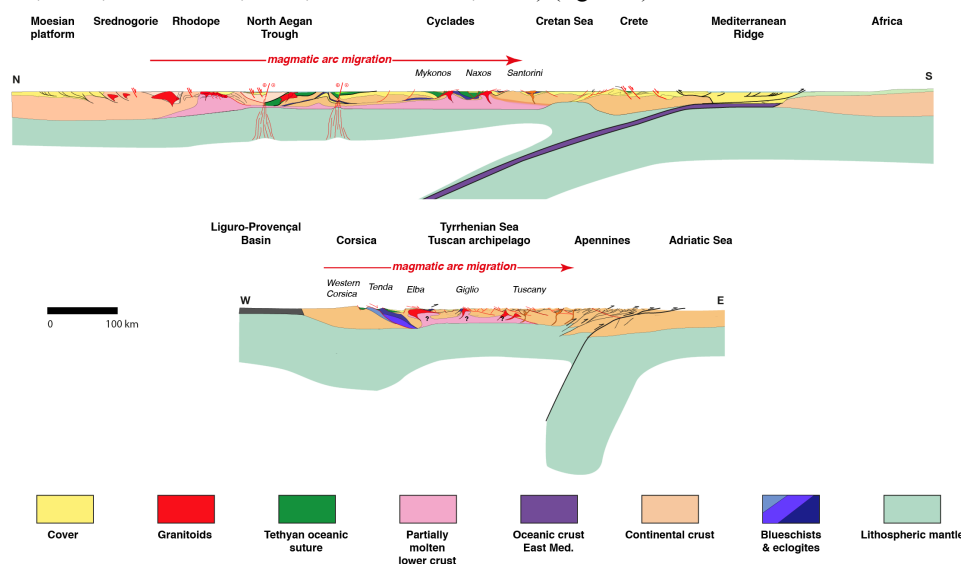

Figure 3: Two lithospheric-scale cross-sections of the Aegean domain (Jolivet and Brun, 2010) and the Northern Tyrrhenian Sea and the Apennines (Jolivet et al., 1998).

These two subduction zones started to retreat approximately at the same time, 30-35 Ma ago (Jolivet and Faccenna, 2000). A first-order change in the geodynamics of this region indeed occurred at this period, also coeval with the hard collision between Africa and Eurasia in the eastern and westernmost Mediterranean. The subducting African lithosphere, locked between two collision zones, continued to subduct northward but with a significant component of retreat.

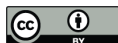

89 Since that time subduction has been continuous, with however several episodes of slab  
90 detachment and tearing (Wortel and Spakman, 2000; Spakman and Wortel, 2004; Faccenna and  
91 Becker, 2010; Faccenna et al., 2014). The Aegean plutons studied in this paper were emplaced  
92 during the formation of a large tear in the subducting lithosphere between 16 and 8 Ma (Jolivet  
93 et al., 2015). The oldest North Tyrrhenian pluton is dated around 7 Ma in Elba (Westerman et  
94 al., 2004) and the youngest ones, Pliocene in age (Serri et al., 1993), are currently exploited for  
95 geothermal energy in Tuscany (Rossetti et al., 2008; Rochira et al., 2018). All these plutons  
96 contain a significant component of crustal melts and some of them are linked with migmatite  
97 domes such as on Naxos, Mykonos and Ikaria (Jansen, 1977; Urai et al., 1990; Denèle et al.,  
98 2011; Beaudoin et al., 2015; Vanderhaeghe et al., 2018). Mixing and mingling with mafic  
99 magmas are also observed in some of these plutons and the general evolution shows an increase  
100 of the mantle component with time.

101 Most of these plutons are associated with low-angle normal faults (LANF) and shear  
102 zones and they were emplaced in the core of MCCs (Faure et al., 1991; Lee and Lister, 1992;  
103 Lister and Baldwin, 1993; Daniel and Jolivet, 1995; Jolivet et al., 1998; Berger et al., 2013;  
104 Bessière et al., 2017; Rabillard et al., 2018). These LANF and associated ductile shear zones  
105 (we use the term "detachment" for the whole structure, brittle and ductile) started to form before  
106 the emplacement of the plutons, in both regions. The main difference between the two regions  
107 are the kinematics of these detachments (figure 3) (Jolivet et al., 2008) and the role of tectonic  
108 inheritance. In the Aegean, most of the MCCs are capped by north-dipping detachments except  
109 in the southwest where south-dipping detachments are observed. The north-dipping  
110 detachments probably partly reactivate former thrusts related to the building of the Hellenides  
111 orogenic wedge. In the Northern Tyrrhenian Sea and in Tuscany, all detachments dip eastward,  
112 i.e. toward the subduction zone. In that case, the detachments cannot reactivate the former  
113 thrusts of the internal Apennines that dip westward. Only in the case of the oldest detachments,  
114 found in Alpine Corsica, can they correspond to reactivated thrusts. The case of Elba Island  
115 shows the detachments cutting down-section eastward within the stack of former nappes (Keller  
116 and Pialli, 1990; Collettini and Holdsworth, 2004). Whatever the nature (i.e. reactivated  
117 structure or not) and the sense of shear of these detachments, the interaction with the plutons  
118 follows a similar pattern that we recall below, first briefly for the Aegean region and then for  
119 Elba Island (see Rabillard et al., 2018, for details on the Aegean).

120

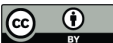

### 3. Aegean plutons

The Miocene Aegean and Menderes plutons were emplaced during a short time period between ~20 Ma and 8 Ma, the oldest cropping out in the Menderes massif and the youngest in the western part of the Aegean region (figures 1, 3) (Jolivet et al., 2015). Those occupying the Cycladic domain are all associated with detachments, either north or south-dipping (figure 4) (Grasemann and Petrakakis, 2007; Rabillard et al., 2018).

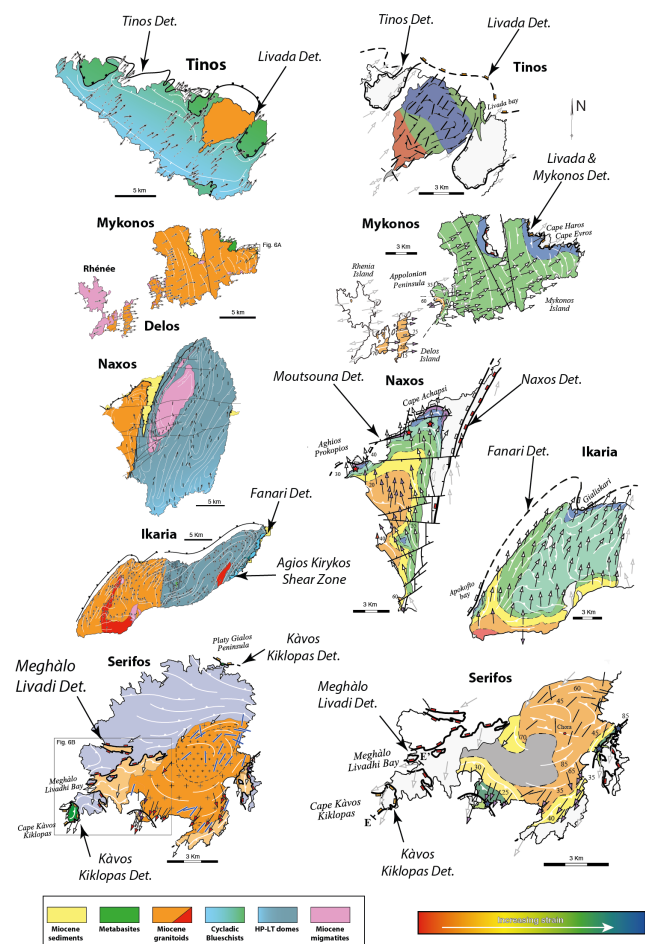

Figure 4: Five examples of the Aegean granitoids showing the interactions between deformation and intrusion, after Rabillard et al. (2018) and references therein. The left column show maps of the entire islands and the right column shows the internal fabrics of the plutons. These maps were obtained based on deformation grades observed in the field, a scale of grades was designed for each pluton to describe the gradients. Arrows show stretching lineations and sense of shear and black bars on the Tinos and Serifos plutons shows the direction of the magnetic lineation.



136

137        Except for Serifos and Lavrion plutons, associated with the West Cycladic Detachment  
 138 System (WCDS) (Grasemann and Petrakakis, 2007; Berger et al., 2013; Scheffer et al., 2016),  
 139 the plutons crop out in the core of MCCs exhumed by north-dipping detachments, such as the  
 140 North Cycladic Detachment System (NCDS) (Gautier and Brun, 1994b, a; Jolivet et al., 2010)  
 141 or the Naxos-Paros Fault System (NPFS) (Urai et al., 1990; Gautier et al., 1993; Vanderhaeghe,  
 142 2004; Bargnesi et al., 2013; Cao et al., 2017). The detachments upper plate is made of the Upper  
 143 Cycladic Nappe, a remnant of the Pelagonian domain, made of greenschists-facies metabasites  
 144 or serpentinite with, in a few cases, early to late Miocene sediments deposited during extension  
 145 (Angelier et al., 1978; Sanchez-Gomez et al., 2002; Kuhleemann et al., 2004; Menant et al.,  
 146 2013). The MCCs are made of various units of the Cycladic Blueschists, more or less  
 147 retrograded in the greenschist-facies, or the Cycladic basement, showing HT-LP metamorphic  
 148 facies and even anatexis conditions on several islands, such as Naxos, Paros, Mykonos or Ikaria  
 149 (Buick and Holland, 1989; Urai et al., 1990; Buick, 1991; Keay et al., 2001; Duchêne et al.,  
 150 2006; Seward et al., 2009; Kruckenberg et al., 2011; Beaudoin et al., 2015; Laurent et al., 2015;  
 151 Rabillard et al., 2015; 2018). The plutons intruded these MCCs and were sheared at the top by  
 152 the detachments during their emplacement (Rabillard et al., 2018).

153        The granitoids show a variety of facies and composition, but most of them have a crustal  
 154 melting component and some are closely associated with migmatites, as on Ikaria or Mykonos  
 155 (Vanderhaeghe, 2009; Kruckenberg et al., 2011; Denèle et al., 2011; Beaudoin et al., 2015;  
 156 Jolivet et al., 2021). Compositions show a common trend for these plutons indicating that they  
 157 crystallized primarily from I-type magmas with some contamination by the continental crust  
 158 and little fractionation (figure A1, Appendix A). Field evidence show a close association of  
 159 these I-type intrusions with two-micas granites (in Ikaria for instance), migmatites, or both  
 160 (Ikaria, Naxos, Paros, Rheneia-Delos) (Pe-Piper et al., 1997; Pe-Piper, 2000; Pe-Piper et al.,  
 161 2002; Vanderhaeghe, 2004; Bolhar et al., 2010; Bolhar et al., 2012; Bargnesi et al., 2013;  
 162 Beaudoin et al., 2015; Laurent et al., 2015; Jolivet et al., 2021). Tinos, Ikaria and Serifos  
 163 granitoids were emplaced in several magma batches with an evolution through time,  
 164 characterized by more and more mafic compositions and a decrease of the grain size  
 165 (Grasemann and Petrakakis, 2007; Ring, 2007; Bolhar et al., 2010; Petrakakis et al., 2010;  
 166 de Saint Blanquat et al., 2011; Bolhar et al., 2012; Beaudoin et al., 2015; Laurent et al., 2015;  
 167 Rabillard et al., 2015; Ducoux et al., 2016). On Serifos and Naxos, the farthest parts of the  
 168 pluton from the detachment show an enrichment in mafic enclaves and evidence for magma



169 mixing and mingling in the roots of the rising plutons (Rabillard et al., 2015; Bessière et al.,  
 170 2017; Rabillard et al., 2018).

171 A common evolution is observed in several of these plutons during their interaction with  
 172 the system of detachments exhuming their host MCC (Rabillard et al., 2018). A series of two  
 173 or three detachments is observed (figure 4, figure 5).

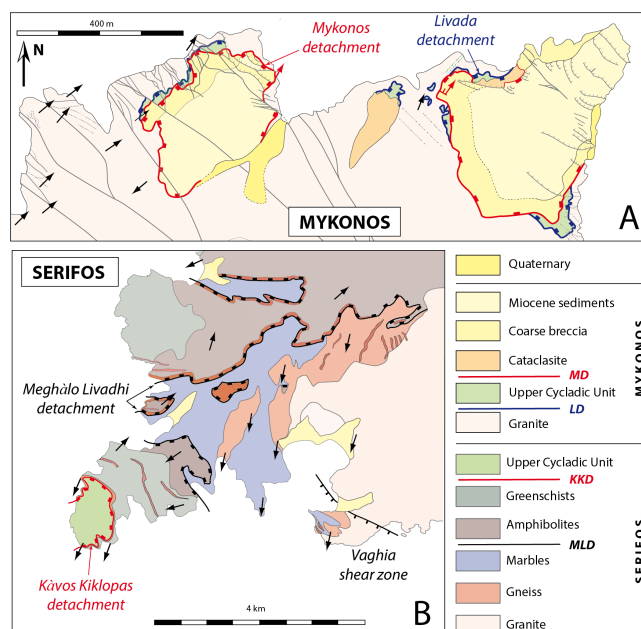

174  
 175 *Figure 5: Details of the two detachments on Mykonos and Serifos. A: northeastern Mykonos*  
 176 *(see location on figure 5), B: Southwest Serifos. The Mykonos (MD) and Livada (LD)*  
 177 *detachments on Mykonos and the mineralized veins and normal faults (baryte and iron-*  
 178 *hydroxides) – grey- are after Menant et al. (2013). The Kàvos Kiklopas (KKD) and Meghàlo*  
 179 *Livadi (MLD) detachments on Serifos are after Grasemann and Petrakakis (2007) and*  
 180 *Ducoux et al. (2016).*  
 181

182 The deepest one is mostly ductile and has started to act long before the granitic intrusion  
 183 that ultimately intrudes it. The upper detachments are mostly brittle and are locally intruded by  
 184 dykes and sills emanating from the main pluton. When a sedimentary basin is present, it is  
 185 deposited on top of the uppermost detachment during extension and can be partly affected by  
 186 mineralized veins (Menant et al., 2013). All plutons show a gradient of shearing deformation  
 187 toward the detachment with an evolution from ductile to brittle (Figure 4). The maps shown in  
 188 figure 4 were drawn after detailed field observations and the construction of a scale of up to 7  
 189 grades of progressive deformation, from non-deformed granitic texture to ultra-mylonites, with  
 190 the progressive appearance of foliation, stretching lineation, localization of C and C' shear



191 bands (Berthé et al., 1979; Lister and Snoke, 1984), for details see Rabillard et al. (2018). The  
192 inner parts of the plutons show mixing of acidic and mafic magmas and a co-magmatic  
193 deformation, co-axial with the post-solidus deformation along the detachment (Rabillard et al.,  
194 2015; 2018). The flow of magma is thus oriented by the regional strain field. Serifos shows (i)  
195 a decrease of grain size through time with an inner facies with smaller grain size and finally  
196 fine-grained dykes and (ii) evidence for hydrothermalism in the root zone of the pluton,  
197 suggesting that the magmatic system was open upward with a possible volcano-plutonic system  
198 (Rabillard et al., 2015; 2018).  
199

#### 4. North Tyrrhenian plutons

200  
201  
202 The Monte Capanne pluton on Elba island (figure 6) is the oldest of a series of plutons  
203 cropping out in the Tuscan archipelago and onshore Tuscany (Serri et al., 1993; Westerman et  
204 al., 2004; Avanzinelli et al., 2009).

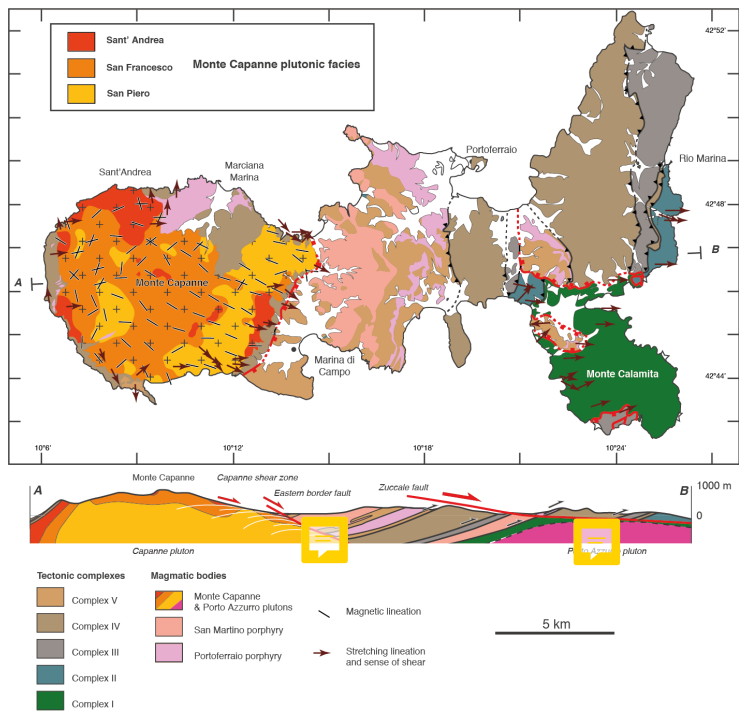

205  
206 *Figure 6: Tectonic map and cross-section of Elba Island showing the main tectonic units and*  
207 *the main extensional shear zones and detachments, modified after Bianco et al. (2015).*  
208 *Details of the internal structure of the Monte Capanne intrusions are reported based on*  
209 *Farina et al. (2010).*



210

211        These plutons belong to magmas migrating from west to east between the end of the  
 212        Oligocene and the Quaternary, mimicking the migration of the Apennines thrust system and the  
 213        HP-LT metamorphism of the internal Apennines and Tuscan Archipelago (Serri et al., 1993;  
 214        Jolivet et al., 1998) (figure 2). This situation is thus very similar to the Aegean Sea. The  
 215        decrease of the time lag between the recording of HP-LT metamorphism or the activation age  
 216        of the thrust front and the magmatism has been interpreted as a consequence of slab steepening  
 217        during retreat (Jolivet et al., 1998; Brunet et al., 2000). Pluton ages decrease eastward from ~8  
 218        Ma to 2-3 Ma (figure 2). Among the youngest plutons are those powering the active geothermal  
 219        fields of Larderello and Monte Amiata (Camelli et al., 1993; Brogi et al., 2003; Rossetti et al.,  
 220        2008). The oldest plutons are observed offshore on Elba (Monte Capanne and Porto Azzuro  
 221        plutons), Monte Cristo and Giglio islands (Westerman et al., 1990) (figure 2). These four  
 222        plutons are granodiorites/monzogranites and they all display a contamination with crustal  
 223        magmas with a main source thought to be lower crustal anatexis (Serri et al., 1993; Innocenti  
 224        et al., 1997). They were emplaced within an overall extensional context during the rifting of the  
 225        Northern Tyrrhenian Sea in the back-arc region of the Apennines (Jolivet et al., 1998). First  
 226        evidenced in Alpine Corsica and on Elba island, a series of east-dipping low-angle detachments  
 227        controlled the kinematics of extension along the Corsica-Apennines transect from the  
 228        Oligocene onward (Jolivet et al., 1998). Extension is shown to migrate from west to east with  
 229        time and it is active at present in the highest altitude regions of the Apennines just west of Corno  
 230        Grande peak with however west-dipping normal faults (D'Agostino et al., 1998). The youngest  
 231        east-dipping low-angle normal faults are seismically active in the Alto Tiberina region  
 232        (Collettini and Barchi, 2002, 2004; Pauselli and Ranalli, 2017). Evidence for top-to-the east  
 233        shearing deformation is found within the plutons of the Tuscan archipelago, but the  
 234        detachments crop out nicely mostly on Elba island (Keller and Pialli, 1990; Daniel and Jolivet,  
 235        1995; Collettini and Holdsworth, 2004; Liotta et al., 2015).

236

#### 237        4.1. Monte Capanne pluton, Elba Island

238        Elba, the largest island of the Tuscan archipelago, shows the relations between  
 239        peraluminous magmatic bodies and two east-dipping low-angle shear zones cutting down-  
 240        section within the Tuscan nappe stack emplaced before extension started (figure 6) (Keller and  
 241        Pialli, 1990; Bouillin et al., 1993; Pertusati et al., 1993; Daniel and Jolivet, 1995; Westerman  
 242        et al., 2004; Bianco et al., 2015). Five thrust packages (complexes I to V) are separated by west-  
 243        dipping low-angle reverse faults (Trevisan, 1950; Barberi et al., 1967; Perrin, 1975; Pertusati



244 e (Brunet et al., 1993; Bianco et al., 2015; Bianco et al., 2019). Long thought free of any HP-LT imprint,  
245 at variance with the nearby Gorgona and Giglio islands where the presence of Fe-Mg-carpholite  
246 attest for blueschist-facies metamorphism (Rossetti et al., 1999a; 1999b), the nappe stack has  
247 only recently revealed HP-LT parageneses along the east coast of the island (Bianco et al.,  
248 2015). Through a correlation with the HP-LT units of Gorgona (Rossetti et al., 1999), where  
249  $^{40}\text{Ar}/^{39}\text{Ar}$  dating on micas yielded ages around 25 Ma (Brunet et al., 2000), the Elba blueschists  
250 are attributed to the Oligocene-Early Miocene.

251 The Nappe stack is intruded by the shallow-level San Martino and Portoferraio porphyries  
252 coeval with the Monte Capanne pluton (figure 6), spanning a short period between 8 and 6.8  
253 Ma, showing that the magma has intruded the detachment in a late stage (Saupé et al., 1982;  
254 Juteau et al., 1984; Ferrara and Tonarini, 1985; Bouillin et al., 1994; Westerman et al., 2004).  
255 The Monte Capanne intrusion makes the major part of the western half of the island and the  
256 highest peak. It is surrounded by a contact metamorphic aureole developed at the expense of  
257 the nappe stack (Duranti et al., 1992; Dini et al., 2002; Rossetti et al., 2007; Rossetti and Tecce,  
258 2008). The metamorphic parageneses within the aureole suggest an emplacement at a depth of  
259 4-5 km (Dini et al., 2002; Rocchi et al., 2002; Farina et al., 2010; Pandeli et al., 2018). The  
260 pluton shows an internal deformation with a gradient of shearing toward the east attested by the  
261 magnetic fabric, stretching lineation and sense of shear (Bouillin et al., 1993; Daniel and Jolivet,  
262 1995). The pluton and the metamorphic aureole are separated from the nappe stack by an east-  
263 dipping low-angle shear zone (Capanne shear zone) evolving into a brittle east-dipping fault  
264 (eastern border fault) (Daniel and Jolivet, 1995). Syn-kinematic contact metamorphism  
265 minerals coeval with top-to-the east kinematic indicators attest for the syn-kinematic nature of  
266 the intrusion (Daniel and Jolivet, 1995; Pandeli et al., 2018).

267 The eastern part of the island shows granitic dykes emanating from the buried younger  
268 Porto Azzuro pluton intruding the Calamiti schists complex (Complex I, figure 6) (Daniel and  
269 Jolivet, 1995; Maineri et al., 2003; Musumeci and Vaselli, 2012). Here too, evidence for top-  
270 to-the east shearing at the time of intrusion have been described (Daniel and Jolivet, 1995)  
271 (figure 7). The pluton and the Calamiti schists are topped by the Zuccale low-angle normal fault  
272 that cuts down-section across the entire nappe stack with clear evidence of top-to-the east  
273 shearing (figure 8) (Keller and Pialli, 1990; Keller et al., 1994; Collettini and Holdsworth,  
274 2004).

275 The main facies of the Monte Capanne pluton exhibits a constant, peraluminous,  
276 monzogranitic composition (Poli et al., 1989; Dini et al., 2002; Gagnevin et al., 2004) while the  
277 mafic microgranular enclaves (MME) varies from tonalitic-granodioritic to monzogranitic. The



278 leucogranitic dykes are syenogranitic in composition (Gagnevin et al., 2004). Gagnevin et al.  
 279 (2004) proposed a multiphase magmatic emplacement from peraluminous magmas issued from  
 280 melting of a metasedimentary basement and hybridized with mantle-derived mafic magmas  
 281 whose heat supply possibly enhanced wall-rock assimilation. In addition, injection of mantle-  
 282 derived magma in the Sant' Andreas facies would have triggered extensive fractionation and  
 283 mixing of the basic magma with the resident monzogranitic mush (Poli and Tommasini, 1991).

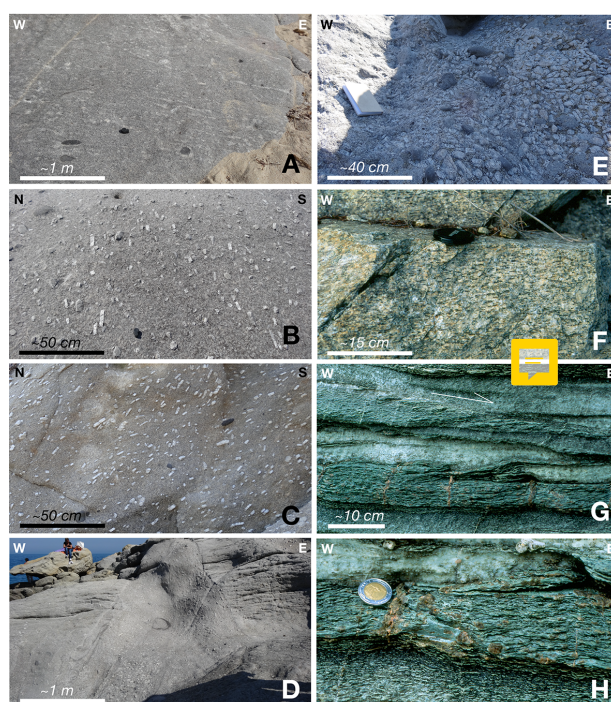

284  
 285 *Figure 7: Photographs of the Sant' Andrea facies in the Monte Capanne pluton and of the*  
 286 *deformation along the eastern margin of the pluton, in the pluton itself and in the contact*  
 287 *metamorphic aureole. A: general view of the orientation of K-feldspar megacrysts and some*  
 288 *mafic enclaves. B: Detailed view of the oriented K-feldspar megacrysts (horizontal plane). C:*  
 289 *zoom on the orientation of K-feldspar megacrysts (vertical plane). D: Cotoncello dyke. E:*  
 290 *cluster of K-feldspar megacrysts in the vicinity of the Cotoncello dyke. F: Mylonitic foliation*  
 291 *within the Monte Capanne shear zone. G: Sigmoidal foliation and top-to-the-east sense of*  
 292 *shear within the metamorphic aureole of the Monte Capanne pluton. H: detailed view of syn-*  
 293 *kinematic contact metamorphism garnets in veins perpendicular to the regional stretching*  
 294 *direction.*  
 295

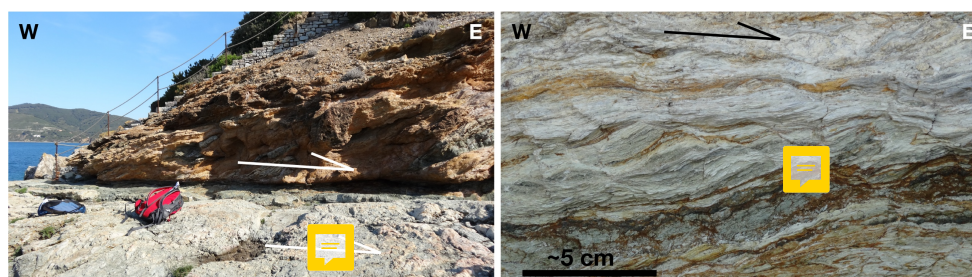

Figure 8: Photographs of the Zuccale detachment and its internal structure (see Collettini and Holdsworth, 2004). Upper: overview of the detachment fault. Lower left: Detail of the contact zone and the truncated foliation in the hanging wall. Lower right: detail of the shear bands indicating top-to-the east kinematics.

The internal magmatic structure of Monte Capanne pluton has been described based on the abundance of large alkali-feldspar phenocrysts (Farina et al., 2010). Three main facies corresponding to different magma batches emplaced within a too short period to be discriminated based on geochronology are reported with downward fining of grain size (figure 6). The largest grain size characterizes the upper Sant' Andrea facies that mainly crops out in the northwest of the pluton, while the finest grain size is observed in the lower San Piero facies cropping out mainly in its eastern part, within the zone affected by the most intense shearing. These three facies delineate an asymmetric dome-shaped bulk structure compatible with the general top-to-the east sense of shear. In the westernmost part of the Monte Capanne pluton near Sant' Andrea, mafic products are observed as large enclaves, with evidence of magma mixing and mingling. These mafic enclaves are mostly found in the Sant' Andrea facies that was emplaced first. Their occurrence in the westernmost part of the plutonic body, the farthest from the detachment, with a geometry similar to that observed on Serifos island in the Cyclades (Rabillard et al., 2015), suggests that they are associated with the root of the pluton.

Assuming that the three main felsic facies correspond to three successive intrusion batches, one observes an evolution toward finer grain size through time, an evolution that is compatible with progressive exhumation and also with a shorter residence time in the magma chamber, suggesting opening of the magmatic plumbing toward the surface leading to volcanic activity, as recorded above the detachment. The last episodes of intrusive activity are seen as a series of felsic dykes striking N-S or NE-SW, due to eastward extensional brittle deformation while the pluton was at near solidus conditions.

#### 4.2. Orientation of K-feldspar megacrysts



325 A detailed study of the orientation of feldspar megacrysts was conducted along the shore  
 326 near Sant'Andrea (figures 7, 9, 10, 11). The pluton is there characterized by a high  
 327 concentration of megacrysts and of mafic enclaves reaching several meters in size. Megacrysts  
 328 show euhedral shapes in general.

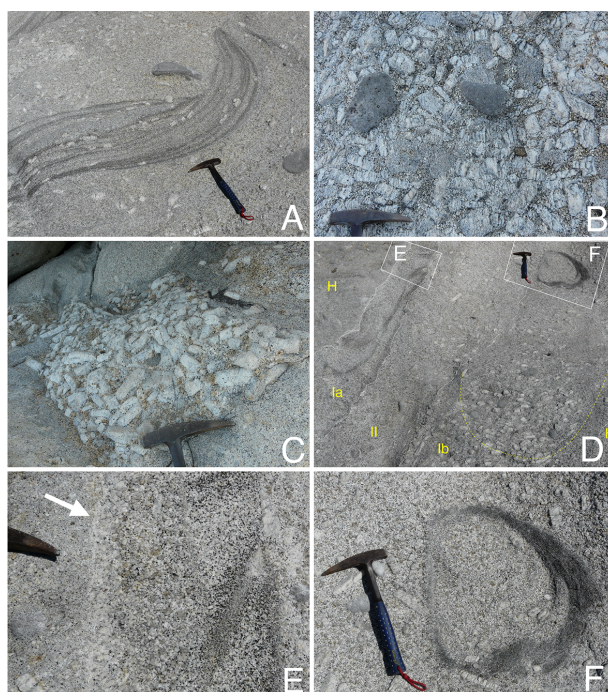

329  
 330 *Figure 9: Photographs of the root zone of the Sant'Andrea facies in the melange zone in and*  
 331 *around the Cotoncello dyke. A: Schlieren with cross-bedding. B: Mush zone with cluster of*  
 332 *K-feldspar megacrysts and mafic enclaves. C: Isolated blob of mush zone with large K-*  
 333 *feldspar megacrysts. D: Folded alternation of leucocratic and melanocratic layers with*  
 334 *schlierens. E: Detail of D, schlieren. F: detail of D: schlieren tube.*  
 335

336 Although the orientation of megacrysts is quite stable at the scale of a few hundred meters,  
 337 in the westernmost region the presence of the large enclaves is associated with a disorientation  
 338 of the megacrysts (figure 10A), indicating increasing tortuosity of the flow wrapping around  
 339 them associated with local turbulence in pressure shadows. Smaller enclaves are in general  
 340 aligned with the megacrysts. Some of the mafic enclaves with lobate shapes show a sharp  
 341 boundary with the felsic matrix, suggesting quenching of a hot mafic magma within the cooler  
 342 felsic magma (Fernandez and Barbarin, 1991; van der Laan and Wyllie, 1993; Fernandez and  
 343 Gasquet, 1994).

344

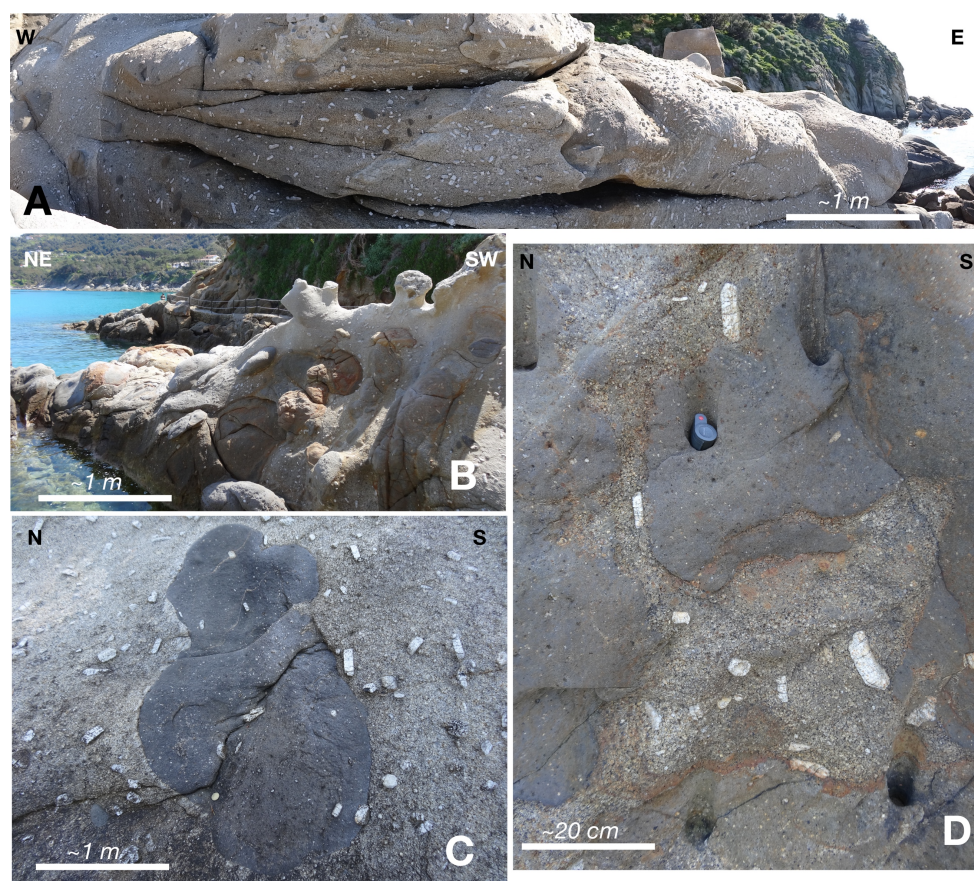

Figure 10: Photographs of large mafic enclaves and melange zones in the westernmost part of the Sant'Andrea facies showing the disorientation of K-feldspar megacrysts and melange facies (mingling).

Other enclaves are less mafic and show evidence of magma mingling-mixing. The disaggregation process of the mafic magma responsible of these enclaves could have happened either in a deep-seated magmatic chamber (Christofides et al., 2007), or more likely in the ascent conduit as a result of remelting of chilled mafic margins (Fernández and Castro, 2018) and subsequent viscous fingering dynamics (Perugini et al., 2005). Megacrysts contain inclusions of biotite, plagioclase and quartz and show euhedral shapes in general, although resorption surface has been noticed (Gagnevin et al., 2008). Other enclaves are less mafic and show evidence of magma mingling-mixing. These enclaves are associated with an aureole where feldspar crystals are concentrated, showing that the assimilation of the enclave occurred at the magmatic stage. Megacrysts are sometimes included within the mafic enclaves, showing that they were already present before the solidification of enclaves and thus providing evidence



of low viscosity contrast between the enclaves and the host magma at the magmatic stage. All these observations suggest that this western zone is a mixing between a mafic magma of mantle origin and a felsic magma partly issued from crustal anatexis and that this part of the pluton is close to the main feeder. This conclusion is confirmed by AMS (anisotropy of magnetic susceptibility) showing that the magnetic foliation and lineation are steeper there than anywhere else in the pluton (Bouillin et al., 1993).

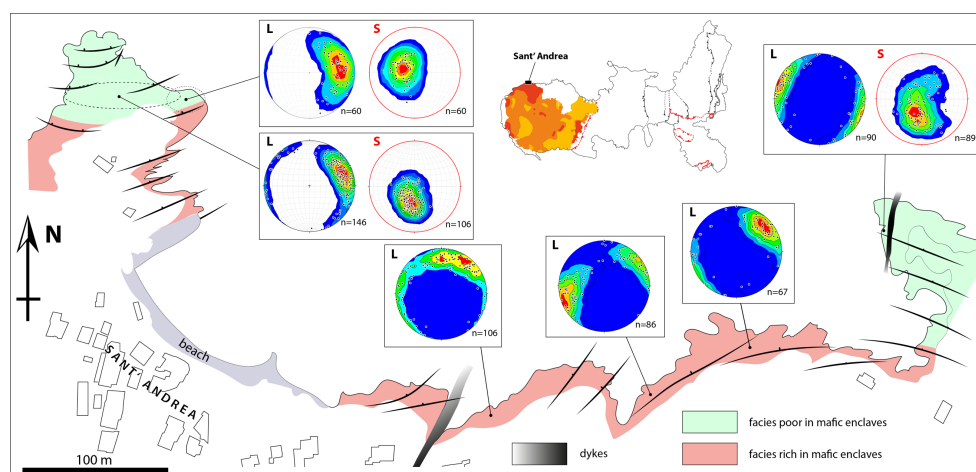

Figure 11: Detailed study of the orientation of K-feldspar megacrysts in the Sant-Andrea facies with foliation trajectories.

Further to the east, still within the Sant' Andrea facies, the main granite is intruded by a N-S syeno-granitic dyke-like structure near Cotoncello headland, made of a finer-grained facies and a lower concentration of megacrysts and enclaves (figure 7D, figure 9). In its vicinity, the host granite contains folded schlierens with cross-bedding (Figure 9A). Within these large schlierens, the megacrysts are aligned parallel with the folded foliation of biotite-rich layers. From place to place, decametric megacryst-rich mush zones enriched in decametric and rounded mafic enclaves occur in this host facies (Figure 9B). In addition, isolated blobs of mush, characterized by an irregular shape, are observed in the coarse-grained, megacryst-poor domains (Figure 9C). These blobs originate from the disruption of preexisting mush zones within the root zone by subsequent magma injection as illustrated by the dyke-like structure (Rodríguez and Castro, 2019). This structure is composed of three successive injections characterized by undulating and fuzzy boundaries (Figure 9D). The westernmost injection (injection Ia, figure 9D) shows folded alternating leucocratic flow-sorted layers made of quartz, K-feldspar and plagioclase with more melanocratic layers rich in biotite that can be described as schlierens (Figure 9E). These schlierens are folded and cross-cut by a subsequent and final

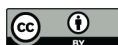

injection (Figure 9D, injection II). In the easternmost injection (Figure 9D, injection Ib), K-feldspar megacrysts are accumulated and their orientation defines a concave upwards foliation. Such mineral fabric is similar to those described by Rocher et al. (2018) in finger and drip structures developed at the margins of the Asha pluton (NW Argentina) and interpreted as mechanical accumulation in a downward localized multiphase magmatic flow. In addition, this megacrysts accumulation is associated at its top with ring schlieren that could represent a cross-section of a schlieren tube (e.g. Žák and Klomínský, 2007) (figure 9F). Ring schlierens are also associated with drip structures in the Asha pluton among others (Paterson, 2009; Rocher et al., 2018). The most external rim between the host body H and injection Ia (Figure 9D) is associated with a reaction zone with recrystallization of quartz and K-feldspar (Figure 9E, white arrow). Outside the injections, the mineral fabric shown by the K-feldspar megacrysts tends to reorientate parallel to the rims.

All these observations point out to an injection of a low viscosity, crystal poor, magma with a viscosity contrast of about one order of magnitude lower with respect to its host magma (Wiebe et al., 2017). Mineral fabrics and accumulation, folded and ring schlieren indicate that the structures were formed by localized multiphase magmatic flow when the crystallizing host magma remained partially molten, probably containing around 50% of crystals (Weinberg et al., 2001). The Cotoncello dyke-like structure is thus co-magmatic with the Sant'Andrea facies, but the pluton was already enough crystallized to allow the formation of N-S cracks in the crystal mush capable of transmitting tectonic stress where the magma was injected.

Between the Cotoncello dyke and the root zone to the west, the proportion of enclaves and megacrysts is everywhere high. Systematic measurements of felspar megacrysts were made (figure 11). Mineral foliation and lineation represents the main orientation distributions of the orientation of (010) faces and [001] major axis of the measured crystals, respectively. At the scale of a few hundred meters the fabric shows a consistent pattern with a low-angle north-dipping foliation more prominent in regions poorer in mafic enclaves. The lineation is in average E-W trending. Late mafic and acidic dykes strike perpendicular to the lineation. Within the mélange zone, the mineral fabric is often perturbed approaching enclave swarms. Then, the fabric becomes more uniform with variations around an average ENE-WSW trend from N30 to N100°E for the long axes of megacrysts.

As the megacrysts were formed in early magmatic conditions (Vernon, 1986; Vernon and Paterson, 2008), they were in suspension within the melt. Such a preferential orientation is due to a rigid rotation of isolated crystals within a viscous matrix submitted to magmatic flow (Fernandez and Laporte, 1984). In the present case, the various observations attesting for a co-



magmatic fabric show that the preferential orientation of the megacrysts foliation results from a fossilization of the magmatic flow. The large-scale variations of the foliation attitude suggest in addition that the E-W to ENE-WSW flow was laminar in general, except in the immediate vicinity of the large enclaves where the flow wrapping around these stronger bodies was more turbulent.

These detailed observations show that the internal magmatic fabric of the pluton is similar in orientation with its overall tectonic fabric, including the sub-solidus deformation along the eastern margin due to the detachment with a main stretching direction oriented WNW-ESE, as shown by magnetic susceptibility studies (Bouillin et al., 1993) and deformation features near the main eastern contact within the eastern extensional shear zone (Daniel and Jolivet, 1995). This focussing of the pluton fabric, from the magmatic stage to the brittle stage around an E-W stretching direction compatible with the extensional shear along the main detachment, suggests that the magmatic flow was oriented parallel to the main direction of extension active at crustal scale since the magmatic stage. A continuum is thus observed from the magmatic stage to the sub-solidus deformation and the localization of the detachment, and this continues during the emplacement of the younger Porto-Azzuro pluton and the formation of the Zuccale low-angle normal fault. This evolution recalls that of the Aegean plutons summarized above.

## 5. Discussion and modelling

### 5.1. Synthesis of observations

The coaxiality of the structures measured in the Monte Capanne pluton from its magmatic stage to the tectonic overprint is similar to observations made on the Cycladic plutons, especially Ikaria and Serifos where a similar gradual transition is observed from the magmatic stage to the localisation of strain along the main detachment. The similarity goes further as the root of the pluton shows a mixture of mafic and felsic facies. On Serifos (figure 4), field observations show that the root of the pluton is characterized by vertical or steep dykes and some of them are dilacerated by the top-south flow while the magma is still viscous (Rabillard et al., 2015). Moving toward the detachment, the sub-solidus deformation takes over with a N-S trending stretching lineation and top-south kinematic indicators. A similar evolution can be observed in the Raches pluton of Ikaria island in the Cyclades (Laurent et al., 2015). Emplaced below to top-to-the north detachment, the magma shows a steep foliation in the south far from



the detachment and it flattens toward the north to become parallel to the detachment plane. Evidence of co-magmatic stretching and shearing parallel to the regional stretching direction is observed in the southern side of the pluton and sub-solidus mylonitization and ultra-mylonites on the northern side. A similar situation can be described in the case of the Naxos granodiorite (Bessière et al., 2017). All cases show the syn-kinematic character of the pluton, the best evidence being the syn-kinematic contact metamorphism.

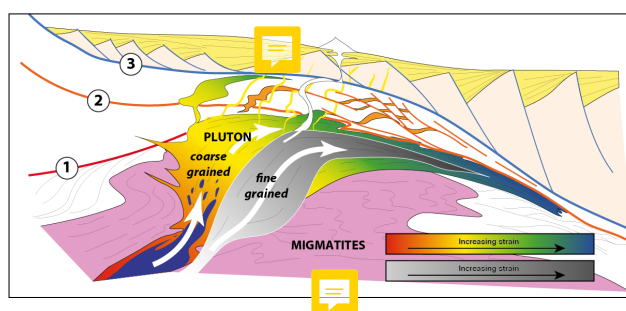

Figure 12: Schematic section showing a conceptual model of the relations between syn-kinematic plutons and the detachments, based on the examples of the Aegean and North Tyrrhenian plutons. Modified from Rabillard et al. (2018).

The Monte Capanne pluton thus shows clear similarities with the Aegean plutons. Figure 12 shows a simplified scheme of the geometrical and kinematic relations between detachments and plutons based on the examples of the Aegean and the Northern Tyrrhenian, modified from Rabillard et al. (2018). The root zone of the pluton, characterized with an association of mafic and acidic magmas, shows a steeper upward magmatic flow and evidence of co-magmatic stretching and shearing parallel to the regional direction of extension with a kinematics similar to that of the main detachments. During the emplacement of the pluton, the magma chamber progressively opens toward the surface and the granitoids evolve toward finer-grained facies. Progressive extension and exhumation is accompanied by the inflation of the pluton and injection of dykes across the ductile detachment. New detachments are formed above sequentially.

## 5.2. A conceptual model based on published numerical experiments

This evolution can be compared with numerical models. Thompson and Connolly (1995) summarize the three ways of melting lower continental crust as (1) supplying water to the crust to lower the solidus, (2) decreasing pressure and (3) providing additional heat to the lower crust. They also state that extension alone of a thickened crust is unlikely to reach the conditions of



482 lower crustal melting unless some additional heat is given by the mantle. Back-arc regions  
483 above retreating slabs, where the lithosphere is thinned and the asthenosphere advected upward  
484 underneath the crust seem to the first order to fit these conditions (Roche et al., 2018).  
485 Schubert et al. (2013) have explored numerically the effect of the injection of molten  
486 mafic material in an extending crust. They show that the injection of this hot material in the  
487 lower crust will induce melting and trigger the formation of felsic magmas that will then ascent  
488 along steep normal faults all the way to the upper crust, forming the observed plutons. This is  
489 a situation that can easily be compared with the Aegean or the Tuscan archipelago where the  
490 granitoids are associated in their root zones with coeval mafic magmas and the felsic plutons  
491 ascend along low-angle detachments. In figure 13, we propose a further conceptual model based  
492 on numerical experiments of post-orogenic extensional deformation with low-angle shear zones  
493 (Huet et al., 2011).

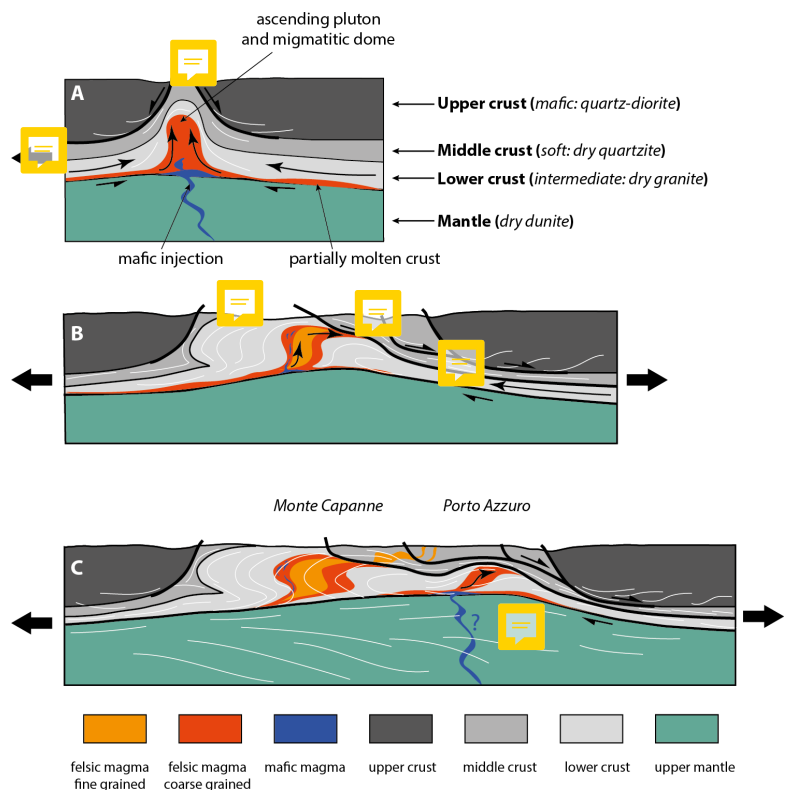

494  
495 *Figure 13: Conceptual model of the succession of events leading to the emplacement of a*  
496 *plutonic system below an active series of detachments, based on Huet et al. (2011) and*  
497 *Schubert et al. (2013).*  
498

499



500 In this series of numerical experiments, the thermal gradient and Moho temperature were  
501 varied as well the rheological stratification with either a classical rheological stratification or  
502 an inverted crustal structure resulting from the formation of the pre-extension nappe stack, the  
503 latter setup being used in figure 13, see also Labrousse et al. (2016) for more details on the  
504 dynamics of this system with inverted rheological profiles. This latter choice is designed to  
505 mimic the Aegean orogenic wedge where the Cycladic Blueschists Unit is sandwiched between  
506 the Cycladic Basement and the Upper Cycladic Unit (UCU) (Huet et al., 2009; Jolivet and Brun,  
507 2010; Ring et al., 2010). The UCU belongs to the Pelagonian paleogeographic domain and is  
508 largely composed of an ophiolite, denser and stronger than the CBU (Labrousse et al., 2016) as  
509 well as other basement lithologies (Reinecke et al., 1982; Katzir et al., 1996; Soukis and  
510 Papanikolaou, 2004; Martha et al., 2016; Lamont et al., 2020). Asymmetric lateral boundary  
511 conditions are applied with 1 cm/yr on the left side and no displacement of the right side as in  
512 Tirel et al. (2004). The upper surface is free and the base is driven by hydrostatic forces. No  
513 prescribed discontinuity is introduced in the model, strain localization is only due to the use of  
514 random noise in the cohesion value of the upper crust (for more details, see Huet et al., 2011).  
515 The results shown here represent a case where the rheological stratification is inverted and the  
516 thermal gradient is high, a likely situation in the Aegean or Tyrrhenian post-orogenic and back-  
517 arc contexts.

518 The conceptual model of the interactions between the numerical model dynamics and the  
519 intrusions is that we assume that a batch of mafic magmas, issued from partial melting of the  
520 mantle, is injected at the base of the lower crust where it triggers the melting of felsic materials.  
521 This leads to the formation of migmatites and collection of the felsic melts in a rising pluton  
522 progressively caught in the detachment dynamics as it reaches the upper parts of the crust. The  
523 felsic magma is thus deformed while it is still partly liquid and then mylonitized once it has  
524 cooled down below the solidus. While extension proceeds, the overburden is removed by the  
525 activity of the detachment and the molten material that comes next is injected in lower pressure  
526 conditions and finds a faster access to the surface because of extension, thus leading to smaller  
527 grainsize plutonic facies and probable volcanism at the surface. While the system of  
528 detachments migrates toward the right and a new dome forms, the same situation can be  
529 reproduced and a new pluton is emplaced below a detachment further to the right, closer to the  
530 active detachment. This evolution is reminiscent of the evolution of Elba Island with the  
531 formation of the Monte Capanne pluton in a first stage and the Porto Azzuro pluton in a later  
532 stage.

533



### 5.3. Testing the concept with numerical experiment

This conceptual model is now tested with new numerical experiments involving the emplacement of magmas like in Schubert et al. (2013), but in a different situation where low-angle detachments form, to see whether the introduction of a low-viscosity material in the model developed by Huet et al. (2011) would drastically change the system dynamics or not. This has been done for figures 14, 15 and 16.

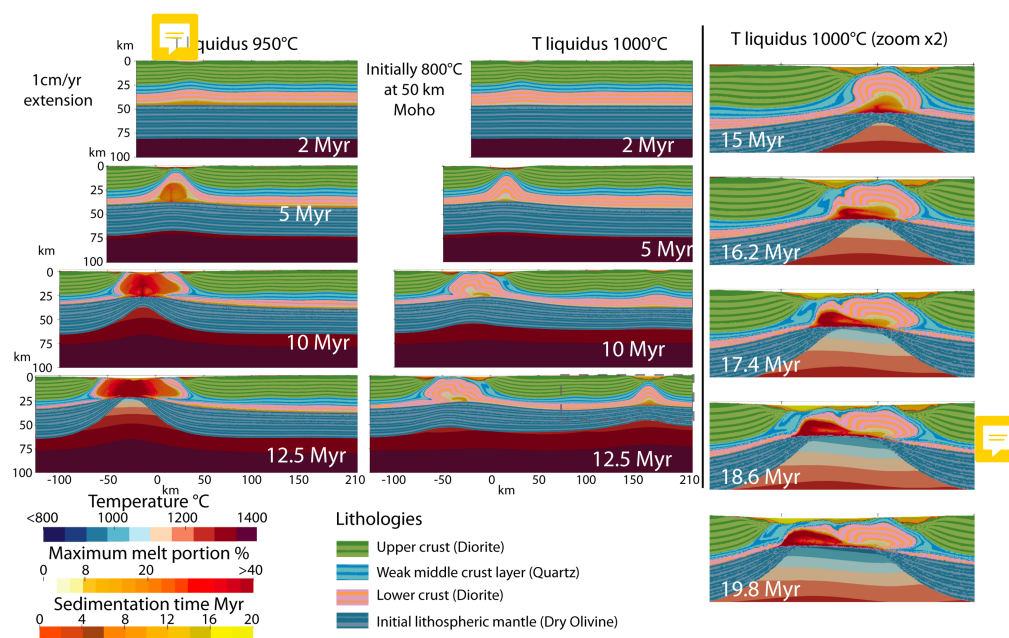

Figure 14: Snapshots of the numerical experiments with two different liquidus temperatures (950°C and 1000°C) from 2 to 12.5 Myr. White line limits the molten lower crust with melt ratio above 40% (pluton).

The kinematics of exhumation produced by the nappe stacking experiments of Huet et al. (2011) produces extension along long-lived detachment better resembling Mediterranean example than diapiric spreading models that are produced by models with no intermediate weak layers as in Tirel et al. (2004, 2008) or Rey et al. (2009). Hence, in order to test how molten rocks interacts with detachments, we decided to build on our experience and start from this set up which is a 210 km wide model domain submitted to 1 cm/yr of extension on its left side for 10 Myr or more with an initial lithospheric column constituted from 25 km upper crust, 10 km weak middle crust, 15 km thick lower crust overlying 40 km of lithospheric mantle. The Moho located at 50 km depth is initially at a temperature of 830°C. We have taken the same

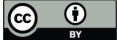

555 rheological parameters which are reported in Table A1 (Appendix A). The four major  
 556 differences with Huet et al. (2011) are :

557

- 558 i) Erosion and sedimentation applied on the top boundary,
- 559 ii) the deforming Wrinkler foundation at the LAB has been replaced by inflow of  
 560 asthenospheric material with higher thermal diffusivity to simulate small scale  
 561 convection and keep the base of the lithosphere at 1300°C during the experiments  
 562 as it was the case in Huet et al. (2011) study,
- 563 iii) the numerical code used in this study is pTatin2d (May et al., 2014, 2015) that solves  
 564 the same momentum equation

$$565 \quad \nabla \cdot \sigma = \rho g$$

566 For velocity  $v$ , as well as heat conservation

567

$$568 \quad -\nabla \cdot (-\kappa \nabla T + vT) + H = \frac{\partial T}{\partial t}$$

569

570 for Temperature  $T$  as Huet et al. (2011). However, it uses an incompressible visco-plastic  
 571 rheology minimizing the stress between a dislocation creep regime and Drucker Prager failure

572

$$573 \quad \begin{aligned} &\nabla \cdot v = 0 \\ &\sigma = \min \left( \sin \phi + 2 C \cos \phi, \dot{\epsilon}^{\frac{1}{n}} A^{\frac{-1}{n}} e^{\frac{Q+VP}{nRT}} \right) \end{aligned}$$

574

575 to evaluate an effective viscosity :

$$576 \quad \eta_r = \frac{\sigma}{2\dot{\epsilon}}$$

577

578 instead of visco-elasto-plastic rheology based on dislocation creep and Mohr Coulomb failure  
 579 criteria.

580

- 581 iv) We added a simplified parametrization in order to account for the mechanical effect  
 582 of a melt in the simulations. The melt fraction  $M_f$  has been introduced as a linear  
 583 function of solidus ( $T_s$ ) and liquidus ( $T_l$ ) temperature

584

$$585 \quad M_f = \min \left( \max \left( \frac{T - T_s}{T_l - T_s}, 0 \right), 1 \right)$$

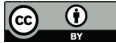

586

587 following Gerya and Yuen (2003). Based on melt fraction, the density and viscosity of passive  
 588 markers are modified following algebraic averaging for density

589

$$590 \quad \rho = M_f \rho_m + (1 - M_f) \rho_r,$$

591

592 and harmonic averaging for viscosity

593

$$594 \quad \eta = \left( \frac{M_f}{\eta_m} + \frac{1-M_f}{\eta_r} \right)^{-1}.$$

595

596 The solidus dependence on pressure  $P$  (in GPa) is implemented following wet granite  
 597 solidus of Miller et al. (2003), but we also added a variable temperature offset  $\Delta T$  to account  
 598 for more mafic granitic composition as follows:

599

$$600 \quad T_s^c = 590 + \frac{250}{10(P + 0.1)} + \Delta T$$

601

602 and the dependence of liquidus to pressure is modeled following:

603

$$604 \quad T_l^c = T_s^c|_{P=0} + 10 + 200P.$$

605

606 The mantle is also allowed to melt following Hirshmann et al. (2000) solidus law

607

$$608 \quad T_s^m = -5.904P^2 + 139.44P + 1108.08$$

$$609 \quad T_l^m = T_s^m + 600$$

610

611 All solidus and liquidus are represented on figure A2 (Appendix A) as a function of  
 612 pressure and temperature. For low melting temperature of the lower crust (wet granite solidus  
 613 with  $\Delta T$  up to 100°C), the crust is largely molten in the initial conditions and buoyancy effects  
 614 dominate forming “spreading domes” in the classification of Huet et al. (2011), and this despite  
 615 the presence of a weak middle crustal layer. For higher melting temperature ( $\Delta T$  from 150°C)  
 616 melt proportion remains below the 8% melt connectivity threshold described by Rosenberg  
 617 and Handy (2005) during most of the simulation. We interpret elements with markers that never



618 crossed that critical threshold as migmatites. In that case, melting does not disrupt the typical  
 619 asymmetric detachment kinematics observed in Elba and in the Cyclades that was well  
 620 reproduced by Huet et al. (2011) study. In the late stage of deformation, when the lithospheric  
 621 mantle is sufficiently attenuated by boudinage, the temperature of the lower crust reaches a  
 622 sufficient temperature to melt more generously, generating plutons which we define as markers  
 623 with a melt proportion greater than 40%.

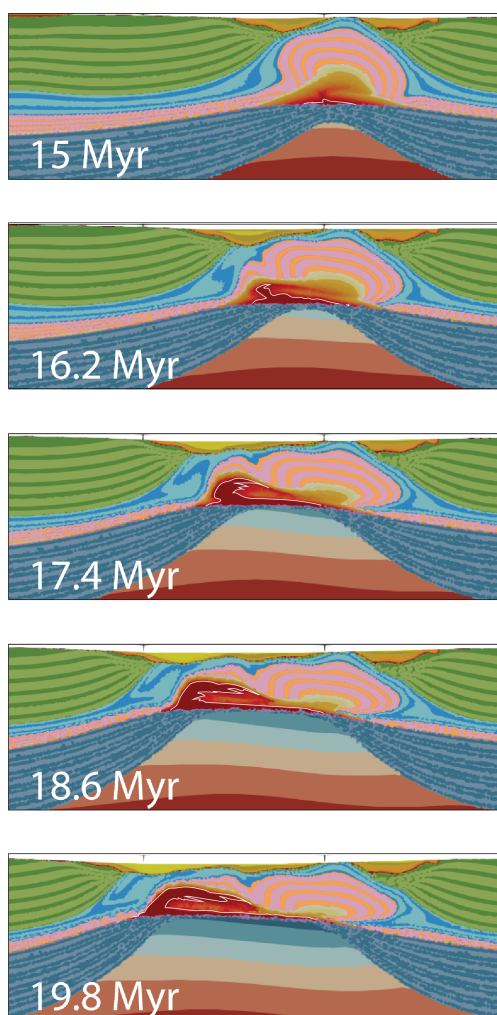

624  
 625 *Figure 15: Zoom of the last 5 Ma of evolution of the model of figure 15 with a liquidus*  
 626 *temperature of 1000°C from 15Myr to 19.8 Myr (black dotted rectangle on figure 15 for*  
 627 *location).*

628  
 629



630 With a temperature of 950°C at the surface for the liquidus, the molten layer is initially  
 631 thicker (figure 14) and strain develops into a spreading dome geometry like in the models of  
 632 Tirel et al. (2004, 2008) or Rey et al. (2009), with symmetric strain pattern and limited strain  
 633 localization. Shear is indeed progressively relocated on newly formed shear zones at the top  
 634 of newly exhumed hot material at the structure axis. When the temperature of the liquidus is  
 635 higher, reaching 1000°C in surface conditions (figure 14), the molten layer is initially thinner,  
 636 the deformation is persistently more localized on a detachment on one edge of the dome  
 637 structure and the model evolves with a detachment on the side of a dome with a limited rate of  
 638 partial melting in the lower crust (<8%). The deformation ultimately migrates to form a second  
 639 dome where a syn-kinematic low viscosity body develops with a melt ratio >40%, which we  
 640 interpret as analogous to a granite intrusion. The late evolution of this second dome shows a  
 641 strongly asymmetric geometry with the shape of the syn-kinematic intrusion controlled by the  
 642 asymmetry in strain pattern and a low-angle shear zone (figure 15). Figure 16 shows a structural  
 643 interpretation of the final step of the model for the second dome highlighting this asymmetry:  
 644 the dome is bounded by two antithetic crustal scale persistent shear zones, with steep and  
 645 shallow dip, and an eccentricity of the intrusion feeding pipe within the dome. This overall  
 646 asymmetrical strain and intrusion localization in the case of limited partial melting rate hence  
 647 reproduces the main features of the strain and intrusion pattern described in the field in the  
 648 Cyclades and Elba.

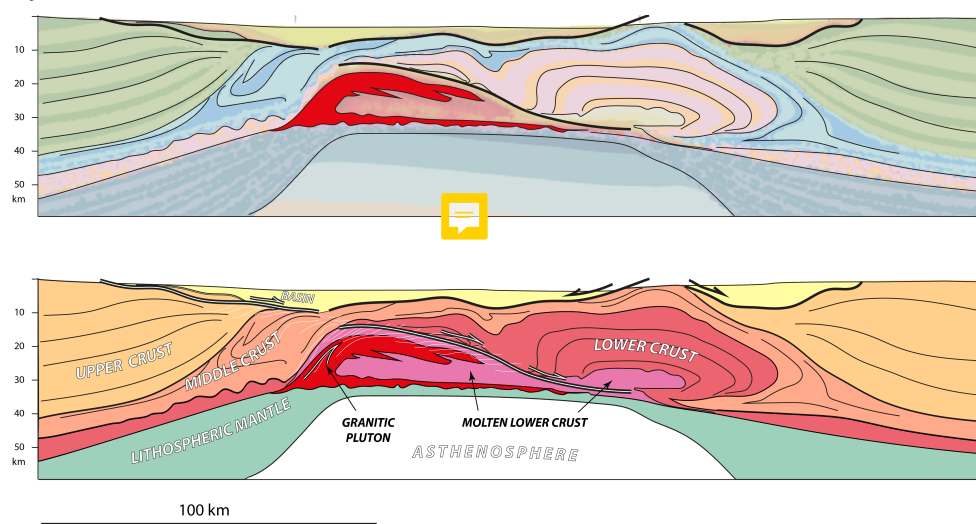

649  
 650 *Figure 16: Structural cross-section based on the most evolved stage of the numerical model at*  
 651 *19.8 Myr.*  
 652



653

654         Although the model does not show the details of the interactions between the dome and  
655 the pluton, which involve percolation of melts, drainage through migmatites and dyke-swarms,  
656 and progressive intrusion of the detachment by the rising granite, the overall geometry and  
657 kinematics is similar with the natural case. The observed geometry is better reproduced in runs  
658 with higher crustal melting temperatures and limited melt production. Low temperature melting  
659 reactions for the continental crust are the wet solidus and the muscovite dehydration solidus,  
660 while biotite and hornblende dehydration melting reactions could represent higher temperature  
661 melting reactions (Weinberg and Hasalová, 2015). The model does not show either the role of  
662 mafic injections at the base of the model. In the case of the Aegean and Monte Capanne, we  
663 have postulated that mafic melts, generated by partial melting of the mantle in the arc and back-  
664 arc region, intrude the lower crust and trigger the generation of felsic melts that then rise within  
665 the dome. This is an additional input of heat in the model that would also localize the weakest  
666 layers and thus the deformation and likely favor the evolution of the model in the same direction  
667 as in the model presented here with a lower melting temperature. Similar evolution can arise  
668 with an additional input of water in the lower crust. This water may originate from amphibole-  
669 rich gabbros (sanukitoides) that could act as water donors enhancing lower crustal partial  
670 melting to further produce secondary I-type granites (Castro, 2020). In the Aegean arc, whereas  
671 amphibole bearing, I-type granites (Naxos and Serifos granodiorites among others) likely  
672 reassemble secondary I-type granites as described by Castro et al. (2020 and references therein),  
673 this water origin remains elusive as amphibole-bearing mantle magmas are not yet evidenced  
674 interacting with the migmatites, except in the Mykonos-Delos-Rheneia MCC (Jolivet et al.,  
675 2021).

676         The metamorphic parageneses associated with contact metamorphism in the case of Elba  
677 suggests a depth of emplacement of the pluton of 4-5 km. In the numerical model, the genesis  
678 of the pluton starts in the lower crust at a larger depth. The contact metamorphism observed in  
679 the field characterizes the upper part of the pluton after it had risen within the crust, which may  
680 explain this apparent contradiction.

681         One additional factor has not been considered in this study, the heterogeneity of the crust  
682 inherited from earlier tectonic events. It has been shown by numerical experiments that dipping  
683 heterogeneities in the crust mimicking structures inherited from nappe stacking help localizing  
684 deformation, favoring the development of asymmetrical extensional structures and the  
685 development of MCCs (Le Pourhiet et al., 2004; Huet et al., 2011; Lecomte et al., 2011; 2012).  
686 Using this sort of initial conditions with melting would also favor the localization of



deformation on a single detachment. It may alternatively favor the development of several asymmetric domes with low-angle detachments. Future studies should focus on testing such initial conditions and also test these processes in 3-D.

~~The comparison of the Aegean and North Tyrrhenian plutons shows that the model of interactions between plutons and detachments proposed by Rabillard et al. (2018) is reproducible in similar contexts in different regions and can thus be probably generalized.~~ The comparison of this field-based conceptual model with numerical models moreover suggests that this conceptual model is physically feasible. It requires the concomitance of post-orogenic extension, thus extension set on an orogenic wedge, and a back-arc context to provide the necessary heat and water for the generation of magmas in the mantle and the crust. The possibility of a slab tear would be even more favorable as it increases the possibilities of advecting hot asthenosphere directly below the extending crust (Roche et al., 2018).

As shown in the 3-D numerical experiments of Roche et al. (2018), slab retreat and back-arc extension lead to the boudinage of the lithosphere with a spacing of ~100 km which will then localize the formation of crustal domes and detachments. This type of evolution may explain the formation of the lines of domes observed in the Aegean and the Menderes Massif. Whether the boudinage also focuses the collection of mantle-derived magmas below the domes is a question that should be addressed by further modelling. This question is important also because the interactions between plutons and detachments described here and in Rabillard et al. (2018) may provide guides for geothermal exploration. The case of the Menderes Massif is exemplary of the intimate relations between active geothermal fields and crustal-scale detachments (Roche et al., 2018). The case of the Tuscan Archipelago is partly similar with the geothermal fields of Larderello and Monte Amiata developed above recent shallow plutons in a context of **asymmetric extension with top-to-the east low-angle shear zones** (Jolivet et al., 1998; Brogi et al., 2003; Rochira et al., 2018). The Monte Capanne and Porto Azzuro plutons on Elba are associated with hydrothermal activities and mineralization (Mairi et al., 2003; Rossetti and Tecce, 2008; Liotta et al., 2015) that make them good exhumed analogues of active geothermal fields, a situation that is found also in the Cyclades with the mineralizations observed on Mykonos or Serifos in the Cyclades (Salemink, 1985; St. Seymour et al., 2009; Menant et al., 2013; Tombros et al., 2015; Ducoux et al., 2016).

## 6. Conclusions



720 The comparison between the Aegean and Tyrrhenian Miocene plutons shows striking  
721 similarities in their interactions with coeval detachments. These plutons were all emplaced  
722 underneath low-angle ductile shear zones and brittle detachments in a post-orogenic back-arc  
723 environment where extra heat is provided by advected asthenospheric mantle. The roots of  
724 those felsic plutons show a mixing with mafic magmas. The magmatic fabric is steep in the  
725 vicinity of the roots and shallows toward the detachments. The plutons record substantial  
726 stretching and shearing coaxial with the regional deformation while they still contain a  
727 significant amount of melt. In sub-solidus conditions, the granitoids are then mylonitized when  
728 approaching the detachment, until the formation of ultra-mylonites and pseudotachylytes. In  
729 both cases too, the felsic magma intrudes the detachment and invades the upper plate. A  
730 migration of detachments is then observed from the deep and ductile detachments to more  
731 brittle and surficial ones. Late magmatic batches show a smaller grain size compatible with an  
732 opening of the magma chamber toward the surface suggestive of the volcano-plutonic context  
733 of these plutons. To account for these similarities suggesting that this model can be generalized  
734 we proposed a conceptual model where mafic magmas batches are injected in the lower crust  
735 of an extending orogenic wedge in a back-arc region with low-angle detachments. These mafic  
736 injections trigger the melting of the lower crustal felsic material and the ascent of felsic plutons  
737 in the crust, controlled by the low-angle detachments. The migration of the detachments through  
738 time explains the migration of plutons and detachments observed in the Tuscan Archipelago  
739 and in Tuscany from the Late Miocene to the Late Pliocene, as well as in the Aegean. This  
740 conceptual model is tested with a numerical approach showing the impact of melt supply in the  
741 development of the dome strain pattern. The observed asymmetry of strain localization and  
742 intrusion are reproduced for a limited melting rate, while a higher melting rate would lead to  
743 the development of a completely different dome structure. The geometry and kinematics  
744 observed in the field are well reproduced by the model. These intimate interactions between  
745 plutons and detachments can be foreseen as useful guides for the prospection and understanding  
746 of geothermal and associated mineralization.

747 **Author contribution:** Laurent Jolivet, Laurent Arbaret, Florent Cheval-Garabedian, Vincent  
748 Roche and Aurélien Rabillard did the field work in the Aegean, Loïc Labrousse and Laetitia Le  
749 Pourhiet designed the modeling procedure and ran the numerical experiments. All authors  
750 contributed to the writing of the manuscript.

751 **Competing interests:** The authors declare that they have no conflict of interest.



**Acknowledgments:** This paper is a contribution of the ERC Advanced Research Grant RHEOLITH (grant agreement No.290864), of Institut Universitaire de France and Labex VOLTAIRE.

## References

- Angelier, J., Glauçon, G., Muller, C., 1978. Sur la présence et la position tectonique du Miocène inférieur marin dans l'archipel de Naxos (Cyclades, Grèce). C. R. Acad. Sc. Paris 286, 21-24.
- Avanzinelli, R., Lustrino, M., Mattei, M., Melluso, L., Conticelli, S., 2009. Potassic and ultrapotassic magmatism in the circum-Tyrrhenian region: Significance of carbonated pelitic vs. pelitic sediment recycling at destructive plate margins. *Lithos* 113, 213–227; doi:210.1016/j.lithos.2009.1003.1029.
- Barberi, F., Giglia, G., Innocenti, F., Marinelli, G., Raggi, G., Ricci, C.A., Squarci, P., Taffi, L., Trevisan, L., 1967. Carta geologica dell' isola d'Elba scala 1:25000. C.N.R. Roma.
- Bargnesi, E.A., Stockli, D.F., Mancktelow, N., Soukis, K., 2013. Miocene core complex development and coeval supradetachment basin evolution of Paros, Greece, insights from (U–Th)/He thermochronometry. *Tectonophysics* 595-596, 165-182, dx.doi.org/110.1016/j.tecto.2012.1007.1015.
- Beaudoin, A., Augier, R., Laurent, V., Jolivet, L., Lahfid, A., Bosse, V., Arbaret, L., Rabillard, A., Menant, A., 2015. The Ikaria high-temperature Metamorphic Core Complex (Cyclades, Greece): Geometry, kinematics and thermal structure. *Journal of Geodynamics* 92, 18-41, <http://dx.doi.org/10.1016/j.jog.2015.1009.1004>.
- Berger, A., Schneider, D.A., Grasemann, B., Stockli, D., 2013. Footwall mineralization during Late Miocene extension along the West Cycladic Detachment System, Lavrion, Greece. *Terra Nova* 25, 181-191, doi: 110.1111/ter.12016.
- Berthé, D., Choukroune, P., Jegouzo, P., 1979. Orthogneiss, mylonite and non coaxial deformation of granites : the example of the South Armorican Shear Zone. *J. Struct. Geol.* 1, 31-42.
- Bessière, E., Rabillard, A., Précigout, J., Arbaret, L., Jolivet, L., Augier, R., Menant, A., Mansard, N., 2017. Strain localization within a syn-tectonic intrusion in a back-arc extensional context: the Naxos monzogranite (Greece). *Tectonics* 37, DOI: 10.1002/2017TC004801.



- 784 Bianco, C., Brogi, A., Caggianelli, A., Giorgetti, G., Liotta, D., Meccheri, M., 2015. HP-LT  
 785 metamorphism in Elba Island: Implications for the geodynamic evolution of the inner  
 786 Northern Apennines (Italy). *Journal of Geodynamics* 91, 13-25;  
 787 <http://dx.doi.org/10.1016/j.jog.2015.1008.1001>.
- 788 Bianco, C., Godard, G., Halton, A., Brogi, A., Liotta, D., Caggianelli, A., 2019. The lawsonite-  
 789 glaucophane blueschists of Elba Island (Italy). *Lithos* 348-349, 105198;  
 790 <https://doi.org/10.1016/j.lithos.2020.105198>.
- 791 Bolhar, R., Ring, U., Allen, C.M., 2010. An integrated zircon geochronological and  
 792 geochemical investigation into the Miocene plutonic evolution of the Cyclades, Aegean  
 793 Sea, Greece: Part 1: Geochronology. *Contrib Mineral Petrol* 160, 719–742, DOI  
 794 10.1007/s00410-00010-00504-00414.
- 795 Bolhar, R., Ring, U., Kemp, A.I.S., Whitehouse, M.J., Weaver, S.D., Woodhead, J.D., Uysal,  
 796 I.T., Turnbull, R., 2012. An integrated zircon geochronological and geochemical  
 797 investigation into the Miocene plutonic evolution of the Cyclades, Aegean Sea, Greece:  
 798 part 2: geochemistry. *Contr. Miner. Petrol.* 164, 915-933.
- 799 Bonin, B., 2004. Do coeval mafic and felsic magmas in post-collisional to within-plate regimes  
 800 necessarily imply two contrasting, mantle and crustal, sources? A review. *Lithos* 78 1–  
 801 24; doi:10.1016/j.lithos.2004.1004.1042.
- 802 Bouillin, J.P., Bouchez, J.L., Lespinasse, P., Pêcher, A., 1993. Granite emplacement in an  
 803 extensional setting: an AMS study of the magmatic structures of Monte Capanne (Elba,  
 804 Italy). *Earth and Planetary Science Letters* 118, 263-279.
- 805 Bouillin, J.P., Poupeau, G., Sabil, N., 1994. Etude thermo-chronologique de la dénudation du  
 806 pluton du Monte Capanne (île d'Elbe, Italie) par les traces de fission. *Bulletin de la Société*  
 807 *Géologique de France* 165, 19-25.
- 808 Brogi, A., Lazzarotto, A., Liotta, D., Ranalli, G., 2003. Extensional shear zones as imaged by  
 809 reflection seismic lines: the Larderello geothermal field (central Italy). *Tectonophysics*  
 810 363, 127-139.
- 811 Brown, M., 1994. The generation, segregation, ascent and emplacement of granite magma: the  
 812 migmatite-to-crustally-derived granite connection in thickened orogens. *Earth-Science*  
 813 *Reviews* 36, 83-130.
- 814 Brown, M., 2007. Crustal melting and melt extraction, ascent and emplacement in orogens :  
 815 mechanisms and consequences. *J. Geol. Soc London* 164, 709-730.
- 816 Brown, M., Solar, G.S., 1998. Shear-zone systems and melts: feedback relations and self-  
 817 organization in orogenic belts. *J. Struct. Geol* 20, 211-227.

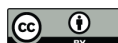

- 818 Brunet, C., Monié, P., Jolivet, L., Cadet, J.P., 2000. Migration of compression and extension in  
 819 the Tyrrhenian Sea, insights from  $^{40}\text{Ar}/^{39}\text{Ar}$  ages on micas along a transect from Corsica  
 820 to Tuscany. *Tectonophysics* 321, 127-155.
- 821 Buick, I.S., 1991. The late alpine evolution of an extensional shear zone, Naxos, Greece. *J.*  
 822 *Geol. Soc.* 148, 93-103; doi:110.1144/gsjgs.1148.1141.0093.
- 823 Buick, I.S., Holland, T.J.B., 1989. The P-T-t path associated with crustal extension, Naxos,  
 824 Cyclades, Greece, in: Daly, J.S. (Ed.), *Evolution of metamorphic belts*, pp. 365-369;  
 825 doi:10.1144/GSL.SP.1989.1043.1101.1132.
- 826 Camelli, G.M., Dini, L., D., L., 1993. Upper crustal structure of the Larderello geothermal field  
 827 as a feature of post-collisional extensional tectonics (southern Tuscany, Italy),, .  
 828 *Tectonophysics* 224, 413-423.
- 829 Cao, S., Neubauer, F., Bernroider, M., Genser, J., Liu, J., Friedl, G., 2017. Low-grade  
 830 retrogression of a high-temperature metamorphic core complex: Naxos, Cyclades,  
 831 Greece. *Geological Society of America Bulletin* 129, 93–117,  
 832 doi:10.1130/B31502.31501.
- 833 Chopra, P.N., Paterson, M.S., 1984. The role of water in the deformation of dunite. *J. Geophys.*  
 834 *Res* 89, 7861-7876.
- 835 Christofides, G., Perugini, D., Koroneos, A., Soldatos, T., Poli, G., Eleftheriadis, G., DelMoro,  
 836 A., Neiva, A.M., 2007. Interplay between geochemistry and magma dynamics during  
 837 magma interaction: an example from the Sithonia Plutonic Complex (NE Greece). *Lithos*  
 838 95, 243–266.
- 839 Collettini, C., Barchi, M.R., 2002. A low-angle normal fault in the Umbria region (Central  
 840 Italy): a mechanical model for the related microseismicity. *Tectonophysics* 359, 97-115.
- 841 Collettini, C., Barchi, M R., 2004. A comparison of structural data and seismic images for low-  
 842 angle normal faults in the Northern Apennines (Central Italy): constraints on activity, in:  
 843 Alsop, G.I., Holdsworth, R.E., McCaffrey, K.J.W., M Hands (Eds.), *Flow processes in*  
 844 *faults and shear zones*. Geological Society, London, pp. 95-112.
- 845 Collettini, C., Holdsworth, R.E., 2004. Fault zone weakening and character of slip along low-  
 846 angle normal faults: insights from the Zuccale fault, Elba, Italy. *J. Geol. Soc. London*  
 847 161, 1039-1051.
- 848 D'Agostino, N., Chamot-Rooke, N., Funiciello, R., Jolivet, L., Speranza, F., 1998. The role of  
 849 pre-existing thrust faults and topography on the styles of extension in the Gran Sasso  
 850 range (Central Italy). *Tectonophysics* 292, 229-254.



- 851 Daniel, J.M., Jolivet, L., 1995. Detachment faults and pluton emplacement; Elba Island  
 852 (Tyrrhenian Sea). *Bull. Soc. géol. France* 166, 341-354.
- 853 de Saint Blanquat, M., Horsman, M.E., Habert, G., Morgan, S., Vanderhaeghe, O., Law, R.,  
 854 Tikoff, B., 2011. Multiscale magmatic cyclicity, duration of pluton construction, and the  
 855 paradoxical relationship between tectonism and plutonism in continental arcs.  
 856 *Tectonophysics* 500, 20–33, doi:10.1016/j.tecto.2009.2012.2009.
- 857 Denèle, Y., Lecomte, E., Jolivet, L., Lacombe, O., Labrousse, L., Huet, B., Le Pourhiet, L.,  
 858 2011. Granite intrusion in a metamorphic core complex: the example of the Mykonos  
 859 laccolith (Cyclades, Greece). *Tectonophysics* 501, 52-70,  
 860 doi:10.1016/j.tecto.2011.1001.1013.
- 861 Dini, A., Innocenti, F., Rocchi, S., Tonarini, S., Westerman, D.S., 2002. The magmatic  
 862 evolution of the late Miocene laccolith–pluton–dyke granitic complex of Elba Island,  
 863 Italy. *Geol. Mag.* 139, 257–279; DOI: 210.1017/S0016756802006556.
- 864 Duchêne, S., Aïssa, R., Vanderhaeghe, O., 2006. Pressure-Temperature-time Evolution of  
 865 Metamorphic Rocks from Naxos (Cyclades, Greece): constraints from Thermobarometry  
 866 and Rb/Sr dating *Geodynamica Acta* 19, 299-319.
- 867 Ducoux, M., Branquet, Y., Jolivet, L., Arbaret, L., Grasemann, B., Rabillard, A., Gumiaux, C.,  
 868 Drufin, S., 2016. Synkinematic skarns and fluid drainage along detachments: The West  
 869 Cycladic Detachment System on Serifos Island (Cyclades, Greece) and its related  
 870 mineralization. *Tectonophysics* 695, 1-26;  
 871 <http://dx.doi.org/10.1016/j.tecto.2016.1012.1008>.
- 872 Duggen, S., Hoernle, K., Van den Bogaard, P., Garbe-Schönberg, D., 2005. Post-Collisional  
 873 Transition from Subduction- to Intraplate-type Magmatism in the Westernmost  
 874 Mediterranean: Evidence for Continental-Edge Delamination of Subcontinental  
 875 Lithosphere.
- 876 Duranti, S., Palmeri, R., Pertusati, P.C., Ricci, C.A., 1992. Geological evolution and  
 877 metamorphic petrology of the sequences of eastern Elba (Complex II). *Acta*  
 878 *Vulcanologica Marinelli* Volume, 213-229.
- 879 Faccenna, C., Becker, T.W., 2010. Shaping mobile belts by small-scale convection. *Nature* 465,  
 880 602-605, doi:10.1038/nature09064.
- 881 Faccenna, C., Becker, T.W., Auer, L., Billi, A., Boschi, L., Brun, J.P., Capitanio, F.A.,  
 882 Funiciello, F., Horvath, F., Jolivet, L., Piromallo, C., Royden, L., Rossetti, F., Serpelloni,  
 883 E., 2014. Mantle dynamics in the Mediterranean. *Reviews of Geophysics* 52, 283-332;  
 884 doi:210.1002/2013RG000444.



- 885 Farina, F., Dini, A., Innocenti, F., Rocchi, S., Westerman, D.S., 2010. Rapid incremental  
 886 assembly of the Monte Capanne pluton (Elba Island, Tuscany) by downward stacking of  
 887 magma sheets. *GSA Bulletin* 122, 1463–1479; doi: 1410.1130/B30112.30111.
- 888 Faure, M., Bonneau, M., 1988. Données nouvelles sur l'extension néogène de l'Egée: la  
 889 déformation ductile du granite miocène de Mykonos (Cyclades, Grèce). *C. R. Acad. Sci.*  
 890 *Paris* **307**, 1553-1559.
- 891 Faure, M., Bonneau, M., Pons, J., 1991. Ductile deformation and syntectonic granite  
 892 emplacement during the late Miocene extension of the Aegean (Greece). *Bull. Soc. géol.*  
 893 *France* 162, 3-12.
- 894 Fernandez, A., Barbarin, B., 1991. Relative rheology of coeval mafic and felsic magmas: nature  
 895 of resulting interaction processes and shape and mineral fabric of mafic microgranular  
 896 enclaves, in: Didier, J., Barbarin, B. (Eds.), *Enclaves and Granite Petrology. Development*  
 897 *in Petrology*, 13 Elsevier, pp. 263–275.
- 898 Fernández, C., Castro, A., 2018. Mechanical and structural consequences of magma  
 899 differentiation at ascent conduits: A possible origin for some mafic microgranular  
 900 enclaves in granites. *Lithos* 320–321, 49–61;  
 901 <https://doi.org/10.1016/j.lithos.2018.1009.1004>.
- 902 Fernandez, A., Gasquet, D., 1994. Relative rheological evolution of chemically contrasted  
 903 coeval magmas: example of the Tichka plutonic complex (Morocco). *Contribution to*  
 904 *Mineralogy and Petrology* 116, 316–326.
- 905 Fernandez, A., Laporte, D., 1984. Signification of low symmetry in magmatic rocks. *Journal of*  
 906 *structural Geology* 13, 337-347.
- 907 Ferrara, G., Tonarini, S., 1985. Radiometric geochronology in Tuscany : results and problems.  
 908 *Rend. Soc. Ital. Min. Petrol.* 40, 111-124.
- 909 Gagnevin, D., Daly, J.S., Poli, G., 2004. Petrographic, geochemical and isotopic constraints on  
 910 magma dynamics and mixing in the Miocene Monte Capanne monzogranite (Elba Island,  
 911 Italy). *Lithos* 78, 157–195; doi:110.1016/j.lithos.2004.1004.1043.
- 912 Gagnevin, D., Daly, J.S., Poli, G., 2008. Insights into granite petrogenesis from quantitative  
 913 assessment of the field distribution of enclaves, xenoliths and K-feldspar megacrysts in  
 914 the Monte Capanne pluton, Italy. *Mineralogical Magazine* 72, 925–940; DOI:  
 915 910.1180/minmag.2008.1072.1184.1925.
- 916 Gautier, P., Brun, J.P., 1994a. Crustal-scale geometry and kinematics of late-orogenic extension  
 917 in the central Aegean (Cyclades and Evvia island). *Tectonophysics* 238, 399-424;  
 918 doi:310.1016/0040-1951(1094)90066-90063.



- 1919 Gautier, P., Brun, J.P., 1994b. Ductile crust exhumation and extensional detachments in the  
 1920 central Aegean (Cyclades and Evvia islands). *Geodinamica Acta* 7, 57-85.
- 1921 Gautier, P., Brun, J.P., Jolivet, L., 1993. Structure and kinematics of upper Cenozoic  
 1922 extensional detachment on Naxos and Paros (Cyclades Islands, Greece). *Tectonics* 12,  
 1923 1180-1194; doi:1110.1029/1193TC01131.
- 1924 Gerya, T., Yuen, D., 2003. Rayleigh-Taylor instabilities from hydration and melting propel  
 1925 'cold plumes' at subduction zones. *Earth Planet. Sci. Lett.* 212, 47-62.
- 1926 Grasemann, B., Petrakakis, K., 2007. Evolution of the Serifos Metamorphic Core Complex.  
 1927 *Journal of the Virtual Explorer* 27, 1-18.
- 1928 Hansen, F.D., Carter, N.L., 1982. Creep of selected crustal rocks at 1000 MPa. *Trans. Am.*  
 1929 *Geophys. Union* 63, 437.
- 1930 Hirschmann, M.M., 2000. Mantle solidus: experimental constraints and the effects of peridotite  
 1931 composition. *Geochem. Geophys. Geosyst* 1, 2000GC000070.
- 1932 Huet, B., Labrousse, L., Jolivet, L., 2009. Thrust or detachment? Exhumation processes in the  
 1933 Aegean: insight from a field study on Ios (Cyclades, Greece). *Tectonics* 28, TC3007,  
 1934 doi:3010.1029/2008TC002397.
- 1935 Huet, B., Le Pourhiet, L., Labrousse, L., Burov, E., Jolivet, L., 2011. Post-orogenic extension  
 1936 and metamorphic core complexes in a heterogeneous crust: the role of crustal layering  
 1937 inherited from collision. Application to the Cyclades (Aegean domain). *Geophysical J.*  
 1938 *Int.* 184, 611–625, doi: 610.1111/j.1365-1246X.2010.04849.x.
- 1939 Huet, B., Le Pourhiet, L., Labrousse, L., Burov, E., Jolivet, L., 2011. Formation of metamorphic  
 1940 core complex in inherited wedges: a thermomechanical modelling study. *Earth Planet.*  
 1941 *Sci. Lett.* doi:10.1016/j.epsl.2011.07.004.
- 1942 Innocenti, F., Westerman, D.S., Rocchi, S., Tonarini, S., 1997. The Montecristo monzogranite  
 1943 (Northern Tyrrhenian Sea, Italy): a collisional pluton in an extensional setting. *Geological*  
 1944 *Journal* 32, 131-151.
- 1945 Jansen, J.B.H., 1977. Metamorphism on Naxos, Greece. Utrecht University.
- 1946 Jolivet, L., Augier, R., Faccenna, C., Negro, F., Rimmele, G., Agard, P., Robin, C., Rossetti,  
 1947 F., Crespo-Blanc, A., 2008. Subduction, convergence and the mode of backarc extension  
 1948 in the Mediterranean region. *Bull Soc géol France* 179, 525-550.
- 1949 Jolivet, L., Brun, J.P., 2010. Cenozoic geodynamic evolution of the Aegean region. *Int. J. Earth*  
 1950 *Science* 99, 109–138, DOI: 110.1007/s00531-00008-00366-00534.
- 1951 Jolivet, L., Faccenna, C., 2000. Mediterranean extension and the Africa-Eurasia collision.  
 1952 *Tectonics* 19, 1095-1106; doi:1010.1029/2000TC900018.



- 953 Jolivet, L., Faccenna, C., Goffé, B., Mattei, M., Rossetti, F., Brunet, C., Storti, F., Funicello,  
 954 R., Cadet, J.P., Parra, T., 1998. Mid-crustal shear zones in post-orogenic extension: the  
 955 northern Tyrrhenian Sea case. *J. Geophys. Res.* 103, 12123-12160; doi:12110.11029/  
 956 12197JB03616.
- 957 Jolivet, L., Lecomte, E., Huet, B., Denèle, Y., Lacombe, O., Labrousse, L., Le Pourhiet, L.,  
 958 Mehl, C., 2010. The North Cycladic Detachment System. *Earth and Planet. Sci. Lett.* 289  
 959 87-104, doi:110.1016/j.epsl.2009.1010.1032.
- 960 Jolivet, L., Menant, A., Sternai, P., Rabillard, A., Arbaret, L., Augier, R., Laurent, V.,  
 961 Beaudoin, A., Grasemann, B., Huet, B., Labrousse, L., Le Pourhiet, L., 2015. The  
 962 geological signature of a slab tear below the Aegean. *Tectonophysics* 659 166–182, 166–  
 963 182, doi:110.1016/j.tecto.2015.1008.1004.
- 964 Jolivet, L., Sautter, V., Moretti, I., Vettor, T., Papadopoulou, Z., Augier, R., Denèle, Y.,  
 965 Arbaret, L., 2021. Anatomy and evolution of a migmatite-cored extensional metamorphic  
 966 dome and interaction with syn-kinematic intrusions, the Mykonos-Delos-Rheneia MCC.  
 967 *Journal of Geodynamics*, accepted.
- 968 Juteau, M., Michard, A., Zimmermann, J.L., Albarede, F., 1984. Isotopic heterogeneities in the  
 969 granitic intrusion of Monte Capanne (Elba island, Italy) and dating concepts. *Journal of*  
 970 *Petrology* 25, 532-545.
- 971 Katzir, Y., Matthews, A., Garfunkel, Z., Schliestedt, M., Avigad, D., 1996. The tectono-  
 972 metamorphic evolution of a dismembered ophiolite (Tinos, Cyclades, Greece). *Geol.*  
 973 *Mag.* 133, 237-254.
- 974 Keay, S., Lister, G., Buick, I., 2001. The timing of partial melting, Barrovian metamorphism  
 975 and granite intrusion in the Naxos metamorphic core complex, Cyclades, Aegean Sea,  
 976 Greece. *Tectonophysics* 342, 275-312; doi:210. 1016/S0040-1951(1001)00168-00168.
- 977 Keller, J.V., Piali, G., 1990. Tectonics of the island of Elba: a reappraisal. *Boll. Soc. Geol. It.*  
 978 109, 413-425.
- 979 Keller, J.V.A., Minelli, G., Piali, G., 1994. Anatomy of late orogenic extension: the Northern  
 980 Apennines case. *Tectonophysics* 238, 275-294.
- 981 Kruckenberg, S.C., Vanderhaeghe, O., Ferré, E.C., Teyssier, C., Whitney, D.L., 2011. Flow of  
 982 partially molten crust and the internal dynamics of a migmatite dome, Naxos, Greece:  
 983 internal dynamics of the Naxos dome. *Tectonics* 30, 1–24, doi:10.1029/2010TC002751.
- 984 Kuhlemann, J., Frisch, W., Dunkl, I., Kázmér, M., Schmiedl, G., 2004. Miocene siliciclastic  
 985 deposits of Naxos Island: Geodynamic and environmental implications for the evolution  
 986 of the southern Aegean Sea (Greece), in: Bernet, M., Spiegel, C. (Eds.), *Detrital*



- thermochronology - Provenance analysis, exhumation, and landscape evolution of mountain belts. Geological Society of America, pp. 51-65.
- Labrousse, L., Huet, B., Le Pourhiet, L., Jolivet, L., Burov, E., 2016. Rheological implications of extensional detachments: Mediterranean and numerical insights. *Earth-Science Reviews* 161, 233-258; <http://dx.doi.org/210.1016/j.earscirev.2016.1009.1003>.
- Lamont, T.N., Roberts, N.M.W., Searle, M.P., Gojon, P., Waters, D.J., Millar, I., 2020. The age, origin, and emplacement of the Tsiknias Ophiolite, Tinos, Greece. *Tectonics* 39, e2019TC00567; <https://doi.org/10.1029/2019TC005677>.
- Laurent, V., Beaudoin, A., Jolivet, L., Arbaret, L., Augier, R., Rabillard, A., 2015. Interrelations between extensional shear zones and synkinematic intrusions: The example of Ikaria Island (NE Cyclades, Greece). *Tectonophysics* 651-652, 152-171, <http://dx.doi.org/10.1016/j.tecto.2015.1003.1020>.
- Lee, J., Lister, G.S., 1992. Late Miocene ductile extension and detachment faulting, Mykonos, Greece. *Geology* 20, 121-124; doi:10.1130/0091-7613(1992)1020<0121:L MDEAD>1132.1133.CO;1132.
- Le Pourhiet, L., Burov, E., Moretti, I., 2004. Rifting through a stack of inhomogeneous thrusts (the dipping pie concept). *Tectonics* 23, doi:10.1029/2003TC001584.
- Lecomte, E., Le Pourhiet, L., Lacombe, O., 2012. Mechanical basis for the activity of low angle normal faults. *Geophysical Res. Lett.* 39, L03307; doi:10.1029/2011GL050756.
- Lecomte, E., Le Pourhiet, L., Lacombe, O., Jolivet, L., 2011. A continuum mechanics approach to quantify brittle strain on weak faults: application to the extensional reactivation of shallow-dipping discontinuities. *Geophys. J. Int.* 184, 1-11, doi: 10.1111/j.1365-1246X.2010.04821.x.
- Liotta, D., Brogi, A., Meccheri, M., Dini, A., Bianco, C., Ruggieri, G., 2015. Coexistence of low-angle normal and high-angle strike- to oblique-slip faults during Late Miocene mineralization in eastern Elba Island (Italy). *Tectonophysics* 660, 17-34; <http://dx.doi.org/10.1016/j.tecto.2015.1006.1025>.
- Lister, G.S., Baldwin, S., 1993. Plutonism and the origin of metamorphic core complexes. *Geology* 21, 607-610; doi:10.1130/0091-7613(1993)1021<0607:PA TOOM>1132.1133.CO;1132.
- Lister, G.S., Snoke, A.W., 1984. S-C mylonites. *Journal of Structural Geology* 6, 617-638.
- Maineri, C., Benvenuti, M., Costagliola, P., Dini, A., Lattanzi, P., Ruggieri, G., Villa, I.M., 2003. Sericitic alteration at the La Crocetta deposit (Elba Island, Italy): interplay between



- 1020 magmatism, tectonics and hydrothermal activity. *Mineralium Deposita* 38, 67–86; DOI
- 1021 10.1007/s00126-00002-00279-00122.
- 1022 Martha, S.O., Dörr, W., Gerdes, A., Petschick, R., Schastok, J., Xypolias, P., Zulauf, G., 2016.
- 1023 New structural and U–Pb zircon data from Anafi crystalline basement (Cyclades,
- 1024 Greece): constraints on the evolution of a Late Cretaceous magmatic arc in the Internal
- 1025 Hellenides. *International Journal of Earth Sciences* 105, 2031–2060,
- 1026 doi:10.1007/s00531-00016-01346-00538.
- 1027 Menant, A., Jolivet, L., Augier, R., Skarpelis, N., 2013. The North Cycladic Detachment
- 1028 System and associated mineralization, Mykonos, Greece: insights on the evolution of the
- 1029 Aegean domain. *Tectonics* 32, 433–452, doi:10.1002/tect.20037.
- 1030 Miller, C.F., McDowell, S.M., Mapes, R.W., 2003. Hot and cold granites? Implications of
- 1031 zircon saturation temperatures and preservation of inheritance. *Geology* 31, 529–532.
- 1032 Musumeci, G., Vaselli, L., 2012. Neogene deformation and granite emplacement in the
- 1033 metamorphic units of northern Apennines (Italy): Insights from mylonitic marbles in the
- 1034 Porto Azzurro pluton contact aureole (Elba Island). *Geosphere* 8, 470–490;
- 1035 doi:10.1130/GES00665.00661.
- 1036 Pandeli, E., Giusti, R., Elter, F.M., Orlando, A., Orti, L., 2018. Structural setting and
- 1037 metamorphic evolution of a contact aureole: the example of the Mt. Capanne pluton (Elba
- 1038 Island, Tuscany, Italy). *Ophioliti* 43, 41–73; doi: 10.4454/phioliti.v4443i4451.4455.
- 1039 Paterson, S.R., 2009. Magmatic tubes, pipes, troughs, diapirs, and plumes: Late-stage
- 1040 convective instabilities resulting in compositional diversity and permeable networks in
- 1041 crystal-rich magmas of the Tuolumne batholith, Sierra Nevada, California. *Geosphere* 5,
- 1042 496–527; doi: 10.1130/GES00214.00211.
- 1043 Pauselli, C., Ranalli, G., 2017. Effects of lateral variations of crustal rheology on the occurrence
- 1044 of post- orogenic normal faults: The Alto Tiberina Fault (Northern Apennines, Central
- 1045 Italy). *Tectonophysics* 721, 45–55; <http://dx.doi.org/10.1016/j.tecto.2017.1009.1008>.
- 1046 Pe-Piper, G., 2000. Origin of S-type granites coeval with I-type granites in the Hellenic
- 1047 subduction system, Miocene of Naxos, Greece. *European Journal of Mineralogy* 12, 859–
- 1048 875, doi:10.1127/ejm/1112/1124/0859.
- 1049 Pe-Piper, G., Kotopouli, C.N., Piper, D.J.W., 1997. Granitoid rocks of Naxos, Greece: regional
- 1050 geology and petrology. *Geological Journal* 32, 153–171, doi:10.1002/(SICI)1099-
- 1051 1034(199706)199732: 199702<199153::AID-GJ199737>199703.199700.CO;199702-
- 1052 199701.



- 1053 Pe-Piper, G., Piper, D.J.W., 2002. The igneous rocks of Greece. The anatomy of an orogen.  
 1054 Gebrüder Borntraeger, Berlin-Stuttgart.
- 1055 Pe-Piper, G., Piper, D.J.W., 2007. Neogene back-arc volcanism of the Aegean: new insights  
 1056 into the relationship between magmatism and tectonics, in: Beccaluva, L., Bianchini, G.  
 1057 (Eds.), *Cenozoic Volcanism in the Mediterranean Area*. Geological Society of America,  
 1058 pp. 17–31, doi: 10.1130/2007.2418(1102).
- 1059 Pe-Piper, G., Piper, D.J.W., Matarangas, D., 2002. Regional implications of geochemistry and  
 1060 style of emplacement of Miocene I-type diorite and granite, Delos, Cyclades, Greece.  
 1061 *Lithos* 60, 47–66, doi:10.1016/S0024-4937(1001)00068-00068.
- 1062 Perrin, M., 1975. L'île d'Elbe et la limite Alpes-Apennins: données sur la structure géologique  
 1063 et l'évolution tectogénétique de l'Elbe alpine et de l'Elbe apennine. *Bull. Soc. Geol. It.* 94,  
 1064 1929-1955.
- 1065 Pertusati, P.C., Raggi, G., Ricci, C.A., Duranti, S., Palmeri, R., 1993. Evoluzione post-  
 1066 collisionale dell'Elba centro-orientale. *Mem. Soc. Geol. It.* 49, 297-312.
- 1067 Perugini, D., Poli, G., Rocchi, S., 2005. Development of viscous fingering between mafic and  
 1068 felsic magmas: evidence from the Terra Nova Intrusive Complex (Antarctica).  
 1069 *Mineralogy and Petrology* 83, 151–166.
- 1070 Petrakakis, K., Iglseider, C., Zámolyi, A., Rambousek, C., Grasemann, B., Draganitis, E., Kurka,  
 1071 A., Photiades, A., 2010. Serifos Island, Geological Map of Greece. Institute of Geology  
 1072 and Mineral Exploration (IGME).
- 1073 Poli, G., Manetti, P., Tommasini, S., 1989. A petrological review on Miocene–Pliocene  
 1074 intrusive rocks from Southern Tuscany and Tyrrhenian Sea (Italy). *Periodico di*  
 1075 *Mineralogia* 58, 109 – 126.
- 1076 Poli, G.E., Tommasini, S., 1991. Model for the Origin and Significance of Microgranular  
 1077 Enclaves in Calc-alkaline Granitoids. *Journal of Petrology* 32, 657-666.
- 1078 Rabillard, A., Arbaret, L., Jolivet, L., Le Breton, N., Gumiaux, C., Augier, R., Grasemann, B.,  
 1079 2015. Interactions between plutonism and detachments during Metamorphic Core  
 1080 Complex formation, Serifos Island (Cyclades, Greece). *Tectonics* 34, 1080-1106, DOI:  
 1081 10.1002/2014TC003650.
- 1082 Rabillard, A., Jolivet, L., Arbaret, L., Bessière, E., Laurent, V., Menant, A., Augier, R.,  
 1083 Beaudoin, A., 2018. Synextensional Granitoids and Detachment Systems Within  
 1084 Cycladic Metamorphic Core Complexes (Aegean Sea, Greece): Toward a Regional  
 1085 Tectonomagmatic Model. *Tectonics* 37; <https://doi.org/10.1029/2017TC004697>.



- 1086 Ranalli, G., Murphy, D.C., 1987. Rheological stratification of the lithosphere. *Tectonophysics*  
 1087 132, 281-295.
- 1088 Reinecke, T., Altherr, R., Hartung, B., Hatzipanagiotou, K., Kreuzer, H., Harre, W., Klein, H.,  
 1089 Keller, J., Geenen, E., Böger, H., 1982. Remnants of a late Cretaceous high temperature  
 1090 belt on the island of Anafi (Cyclades, Greece). *N. Jb. Miner. Abh* 145, 157-182.
- 1091 Rey, P.F., Teyssier, C., Whitney, D.L., 2009. The Role of Partial Melting and Extensional  
 1092 Strain Rates in the Development of Metamorphic Core Complexes. *Tectonophysics* 477,  
 1093 135-144, doi: 110.1016/j.tecto.2009.1003.1010.
- 1094 Ring, U., 2007. The geology of Ikaria Island: The Messaria extensional shear zone, granites  
 1095 and the exotic Ikaria nappe. *Journal of the Virtual Explorer* 27, 1–32.
- 1096 Ring, U., Glodny, J., Will, T., Thomson, S., 2010. The Hellenic Subduction System: High-  
 1097 Pressure Metamorphism, Exhumation, Normal Faulting, and Large-Scale Extension.  
 1098 *Annu. Rev. Earth Planet. Sci.* 38, 45–76, 10.1146/annurev.earth.050708.170910.
- 1099 Rocchi, S., Westerman, D.S., Dini, A., Innocenti, F., Tonarini, S., 2002. Two-stage growth of  
 1100 laccoliths at Elba Island, Italy. *Geology* 30, 983–986.
- 1101 Roche, V., Sternai, P., Guillou-Frottier, L., Menant, A., Jolivet, L., Bouchot, V., Gerya, T.,  
 1102 2018. Emplacement of metamorphic core complexes and associated geothermal systems  
 1103 controlled by slab dynamics. *Earth and Planetary Science Letters* 498 322–333;  
 1104 <https://doi.org/310.1016/j.epsl.2018.1006.1043>.
- 1105 Rochira, F., Caggianelli, A., de Lorenzo, S., 2018. Regional thermo-rheological field related to  
 1106 granite emplacement in the upper crust: implications for the Larderello area (Tuscany,  
 1107 Italy). *Geodinamica Acta* 30, 225-240, DOI: 210.1080/09853111.09852018.01488912.
- 1108 Rodríguez, C., Castro, A., 2019. Origins of mafic microgranular enclaves and enclave swarms  
 1109 in granites: Field and geochemical relations. *GSA Bulletin* 131, 635–660;  
 1110 <https://doi.org/610.1130/B32028.32021>.
- 1111 Rosenberg, C.L., Handy, M.R., 2005. Experimental deformation of partially melted granite  
 1112 revisited: implications for the continental crust. *Journal of metamorphic Geology* 23
- 1113 Rossetti, F., Balsamo, F., Villa, I.M., Bouybaouenne, M., Faccenna, C., Funicello, R., 2008.  
 1114 Pliocene-Pleistocene HT-LP metamorphism during multiple granitic intrusions in the  
 1115 southern branch of the Larderello geothermal field (southern Tuscany, Italy). *J. Geol.*  
 1116 *Soc. London* 165, 247-262.
- 1117 Rossetti, F., Faccenna, C., Jolivet, L., Funicello, R., Goffé, B., Tecce, F., Brunet, C., Monié,  
 1118 P., Vidal, O., 1999. Structural signature and exhumation P-T-t path of the Gorgona  
 1119 blueschist sequence (Tuscan Archipelago, Italy). *Ophioliti* 26, 175-186.



- 1120 Rossetti, F., Faccenna, C., Jolivet, L., Tecce, F., Funicello, R., Brunet, C., 1999b. Syn- versus  
1121 post-orogenic extension in the Tyrrhenian Sea, the case study of Giglio Island (Northern  
1122 Tyrrhenian Sea, Italy). *Tectonophysics* 304, 71-93; doi:10.1016/S0040-  
1123 1951(1098)00304-00307.
- 1124 Rossetti, F., Tecce, F., 2008. Composition and evolution of fluids during skarn development in  
1125 the Monte Capanne thermal aureole, Elba Island, central Italy. *Geofluids* 8 167–180; doi:  
1126 110.1111/j.1468-8123.2008.00215.x.
- 1127 Rossetti, F., Tecce, F., Billi, A., Brilli, M., 2007. Patterns of fluid flow in the contact aureole  
1128 of the Late Miocene Monte Capanne pluton (Elba Island, Italy): the role of structures and  
1129 rheology. *Contrib Mineral Petrol* 53, 743–760; DOI 710.1007/s00410-00006-00175-  
1130 00413.
- 1131 Salemink, J., 1985. Skarn and ore formation at Serifos, Greece, as a consequence of  
1132 granodiorite intrusion. University of Utrecht, Netherlands.
- 1133 Sanchez-Gomez, M., Avigad, D., Heiman, A., 2002. Geochronology of clasts in allochthonous  
1134 Miocene sedimentary sequences on Mykonos and Paros islands: implications for back-  
1135 arc extension in the Aegean Sea. *J. Geol. Soc. London* 159, 45-60; doi:10.1144/0016-  
1136 764901031.
- 1137 Saupé, F., Marignac, C., Moine, B., Sonet, J., Zimmermann, J.L., 1982. Datation par les  
1138 méthodes K/Ar et Rb/Sr de quelques roches de la partie orientale de l'île d'Elbe (Province  
1139 de Livourne, Italie). *Bulletin de Minéralogie* 105, 236-245.
- 1140 Savelli, C., 1988. Late Oligocene to Recent episodes of magmatism in and around the  
1141 Tyrrhenian Sea: implication for the process of opening in a young inter-arc basin of intra-  
1142 orogenic (Mediterranean) type. *Tectonophysics* 146, 163-181.
- 1143 Savelli, C., 2002a. Tectono-magmatic lineaments and subduction in the central Mediterranean  
1144 and southern Italy during the past 8 Ma. *Boll. Soc. Geol. It.*, 121, 231-242.
- 1145 Savelli, C., 2002b. Time–space distribution of magmatic activity in the western Mediterranean  
1146 and peripheral orogens during the past 30 Ma (a stimulus to geodynamic considerations).  
1147 *Journal of Geodynamics* 34, 99–126.
- 1148 Savelli, C., 2015. Fast Episodes of West- Mediterranean-Tyrrhenian Oceanic Opening and  
1149 Revisited Relations with Tectonic Setting. *Scientific Reports* 5:, 14271; DOI:  
1150 14210.11038/srep14271.
- 1151 Scheffer, C., Vanderhaeghe, O., Lanari, P., Tarantola, A., Ponthus, L., Photiades, A., France,  
1152 L., 2016. Syn- to post-orogenic exhumation of metamorphic nappes: Structure and



- thermobarometry of the western Attic-Cycladic metamorphic complex (Lavriion, Greece).  
 Journal of Geodynamics 96, 174–193; <http://dx.doi.org/10.1016/j.jog.2015.1008.1005>.
- Schubert, M., Driesner, T., Gerya, T.V., Ulmer, P., 2013. Mafic injection as a trigger for felsic  
 magmatism: A numerical study. *Geochem. Geophys. Geosyst.* 14, 1910–1928,  
 doi:10.1002/ggge.20124.
- Serri, G., Innocenti, F., Manetti, P., 1993. Geochemical and petrological evidence of the  
 subduction of delaminated Adriatic continental lithosphere in the genesis of the Neogene-  
 Quaternary magmatism of central Italy. *Tectonophysics* 223, 117–147.
- Seward, D., Vanderhaeghe, O., Siebenaller, L., Thomson, S., Hibsich, C., Zingg, A., Holzner,  
 P., Ring, U., Duchêne, S., 2009. Cenozoic tectonic evolution of Naxos Island through a  
 multi-faceted approach of fission-track analysis, in: Ring, U., Wernicke, B. (Eds.),  
 Extending a continent: architecture, rheology and heat budget. Geological Society,  
 London, pp. 179–196; doi:10.1144/SP1321.1149.
- Soukis, K.I., Papanikolaou, D.J., 2004. Contrasting geometry between Alpine and Late-to-post-  
 Alpine tectonic structures in Anafi Island (Cyclades). *Bulletin of the Geological Society  
 of Greece* vol. 2004 XXXVI, 1688–1696.
- Spakman, W., Wortel, R., 2004. A tomographic view on Western Mediterranean geodynamics,  
 in: Cavazza, W., Roure, F.M., Spakman, W., Stampfli, G.M., Ziegler, P.A. (Eds.), *The  
 TRANSMED Atlas - The Mediterranean region from crust to Mantle*. Springer, Berlin,  
 Heidelberg, pp. 31–52.
- St. Seymour, K., Zouzias, D., Tombros, S., Kolaiti, E., 2009. Geochemistry of the Serifos  
 pluton (Cycladic islands) and associated iron oxide and sulfide ores: Skarn or  
 metamorphosed exhalite deposits? *Neues Jahrbuch für Mineralogie - Abhandlungen* 186,  
 249–270; doi:10.1127/0077-7757/2009/0143.
- Thompson, A.B., Connolly, J.A.D., 1995. Melting of the continental crust: some thermal and  
 petrological constraints on anatexis in continental collision zones and other tectonic  
 settings. *J. Geoph. Res.* 100, 15565–15579.
- Tirel, C., Brun, J.P., Burov, E., 2004. Thermo-mechanical modeling of extensional gneiss  
 domes, in: Whitney, D.L., Teyssier, C., Siddoway, C.S. (Eds.), *Gneiss domes in orogeny*,  
 Boulder, Colorado, pp. 67–78.
- Tirel, C., Brun, J.P., Burov, E., 2008. Dynamics and structural development of metamorphic  
 core complexes. *J. Geoph. Res.* 113, doi:10.1029/2005JB003694.
- Tombros, S.F., St. Seymour, K., Williams-Jones, A.E., Zhai, D., Liu, J., 2015. Origin of a  
 barite-sulfide ore deposit in the Mykonos intrusion, cyclades: Trace element, isotopic,



- 1187 fluid inclusion and raman spectroscopy evidence. *Ore Geology Reviews* 67, 139–157;  
 1188 <http://dx.doi.org/10.1016/j.oregeorev.2014.1011.1016>.
- 1189 Trevisan, L., 1950. L'Elba orientale e la sua tettonica scivolamento par gravità. *Mem. Instit.*  
 1190 *Geol. It. Pavia* 70, 435-470.
- 1191 Urai, J.L., Shuiling, R.D., Jansen, J.B.H., 1990. Alpine deformation on Naxos (Greece), in:  
 1192 Knipe, R.J., Rutter, E.H. (Eds.), *Deformation mechanisms, Rheology and tectonics. Geol.*  
 1193 *Soc. spec. Pub.*, pp. 509-522; doi:10.1144/GSL.SP.1990.1054.1101.1147.
- 1194 van der Laan, S.R., Wyllie, P.J., 1993. Experimental Interaction of Granitic and Basaltic  
 1195 Magmas and Implications for Mafic Enclaves. *Journal of Petrology* 34, 491-517.
- 1196 Vanderhaeghe, O., 2004. Structural development of the Naxos migmatite dome, in: Whitney,  
 1197 D.L., Teyssier, C., Siddoway, C.S. (Eds.), *Gneiss domes in orogeny. Geological Society*  
 1198 *of America, Boulder, Colorado*, pp. 211-227.
- 1199 Vanderhaeghe, O., 2009. Migmatites, granites and orogeny: Flow modes of partially-molten  
 1200 rocks and magmas associated with melt/solid segregation in orogenic belts.  
 1201 *Tectonophysics* 477, 119–134, doi:10.1016/j.tecto.2009.1006.1021.
- 1202 Vanderhaeghe, O., Kruckenberg, S.C., Gerbault, M., Martin, L., Duchêne, S., Deloule, S., 2018.  
 1203 Crustal-scale convection and diapiric upwelling of a partially molten T orogenic root  
 1204 (Naxos dome, Greece). *Tectonophysics* 746; <https://doi.org/10.1016/j.tecto.2018.03.007>,  
 1205 459–469
- 1206 Vernon, R.H., 1986. K-feldspar megacrysts in granites - phenocrysts, not porphyroblasts. *Earth-*  
 1207 *Sci. Rev.* 23, 1-63.
- 1208 Vernon, R.H., Paterson, S.R., 2008. How late are K-feldspar megacrysts in granites? *Lithos*  
 1209 104, 327–336; doi:10.1016/j.lithos.2008.1001.1001.
- 1210 Weinberg, R.F., Hasalová, P., 2015. Water-fluxed melting of the continental crust: A review.  
 1211 *Lithos* 212–215, 158–188; <http://dx.doi.org/10.1016/j.lithos.2014.1008.1021>.
- 1212 Weinberg, R.F., Sial, A.N., Pessoa, R.R., 2001. Magma flow within the Tavares pluton,  
 1213 Northeastern Brazil: compositional and thermal convection. *Bull. Geol. Soc. Am.* 113,  
 1214 508–520.
- 1215 Westerman, D.S., Dini, A., Innocenti, F., Rocchi, S., 2004. Rise and fall of a nested Christmas-  
 1216 tree laccolith complex, Elba Island, Italy, in: Breikreuz, C., Petford, N. (Eds.), *Physical*  
 1217 *geology of high level magmatic systems. Geological Society, London*, pp. 195-213.
- 1218 Westerman, D.S., Innocenti, F., Tonarini, S., Ferrara, G., 1993. The Pliocene intrusions of the  
 1219 island of Giglio. *Mem. Soc. Geol. It.* 49, 345-363.



- 1220 Wiebe, R.A., Jellinek, A.M., Hodge, K.F., 2017. New insights into the origin of ladder dikes:  
1221 Implications for punctuated growth and crystal accumulation in the Cathedral Peak  
1222 granodiorite. *Lithos* 277, 241–258; <http://dx.doi.org/210.1016/j.lithos.2016.1009.1015>.  
1223 Wortel, M.J.R., Spakman, W., 2000. Subduction and slab detachment in the Mediterranean-  
1224 Carpathian region. *Science* 290, 1910-1917.  
1225  
1226



## Appendix A Table A1

1228

|                                                         |          | Sediments<br>(2)       | Upper<br>crust (1)     | Middle<br>crust(2)   | Lower<br>crust(1)    | Lithospheric<br>mantle(3) | Asthenospheric<br>mantle(3) |
|---------------------------------------------------------|----------|------------------------|------------------------|----------------------|----------------------|---------------------------|-----------------------------|
| Density(kg.m <sup>-3</sup> )                            | $\rho_r$ | 2400                   | 2700                   | 2700                 | 2700                 | 3300                      | 3300                        |
| Pre exp. Factor<br>(MPa <sup>-n</sup> s <sup>-1</sup> ) | A        | 2.4                    | 3.3                    | 2.4                  | 3.3                  | 3.5                       | 3.5                         |
| Activation<br>energy(kJ)                                | Q        | 156                    | 186                    | 156                  | 219                  | 532                       | 532                         |
| Stress exponent                                         | n        | 6.7 10 <sup>-6</sup>   | 2 10 <sup>-6</sup>     | 6.7 10 <sup>-6</sup> | 1.3 10 <sup>-3</sup> | 2.5 10 <sup>4</sup>       | 2.5 10 <sup>4</sup>         |
| Melt<br>density(kg.m <sup>-3</sup> )                    | $\rho_m$ | -                      | 2400                   | 2400                 | 2400                 | 2800                      | 2800                        |
| Melt viscosity                                          | $\eta_m$ | -                      | 10 <sup>17</sup>       | 10 <sup>17</sup>     | 10 <sup>17</sup>     | 10 <sup>12</sup>          | 10 <sup>12</sup>            |
| Heat production<br>(Wm <sup>-3</sup> )                  | H        | 1.67 10 <sup>-10</sup> | 1.67 10 <sup>-10</sup> | 0                    | 0                    | 0                         | 0                           |
| Thermal<br>diffusivity                                  | $\kappa$ | 10 <sup>-6</sup>       | 10 <sup>-6</sup>       | 10 <sup>-6</sup>     | 10 <sup>-6</sup>     | 10 <sup>-6</sup>          | 5 10 <sup>-6</sup>          |

1229

1230 *Table A1 : Values and notation for variable physical parameters. Parameters for dislocation*  
 1231 *creep come from 1 (Ranalli and Murphy, 1987), 2 (Hansen and Carter, 1982) and 3 (Chopra*  
 1232 *and Paterson, 1984). Other constant parameters include: friction  $\phi$  and cohesion  $C$  which*  
 1233 *varies linearly with plastic strain in range  $[0,1]$  respectively from 30° to 20° and from 20*  
 1234 *MPas to 2 MPas; Coefficient of thermal expansion and compressibility that are set to  $3 \cdot 10^{-5} K^{-1}$*   
 1235 *and  $10^{-11} Pa^{-1}$ .*

1236

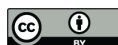

## Appendix A, figure A1 and A2:

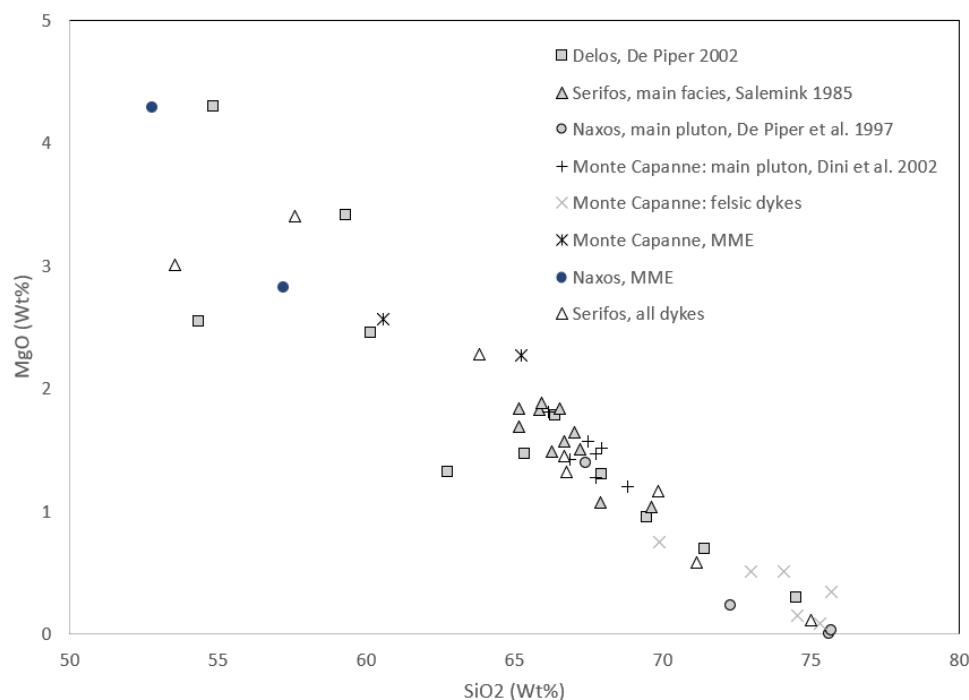

Figure A1: MgO v. SiO<sub>2</sub> Harker diagram showing the negative correlation between whole rock MgO and SiO<sub>2</sub> content for three, I-type hornblende-biotite bearing, representative Aegean granites. Data from Delos intrusion (Pe-Piper et al., 2002), Serifos (Salemink, 1985) and Naxos (Pe-Piper et al., 1997). Mixing/mingling processes between mafic mantle-derived melts and acid magmas produce composite batholiths (Poli and Tommasini, 1990) as illustrated by the case of the Elba Island magmatic complex showed for comparison (See Dini et al. 2002 for explanation). MME = Mafic Microgranular Enclaves.

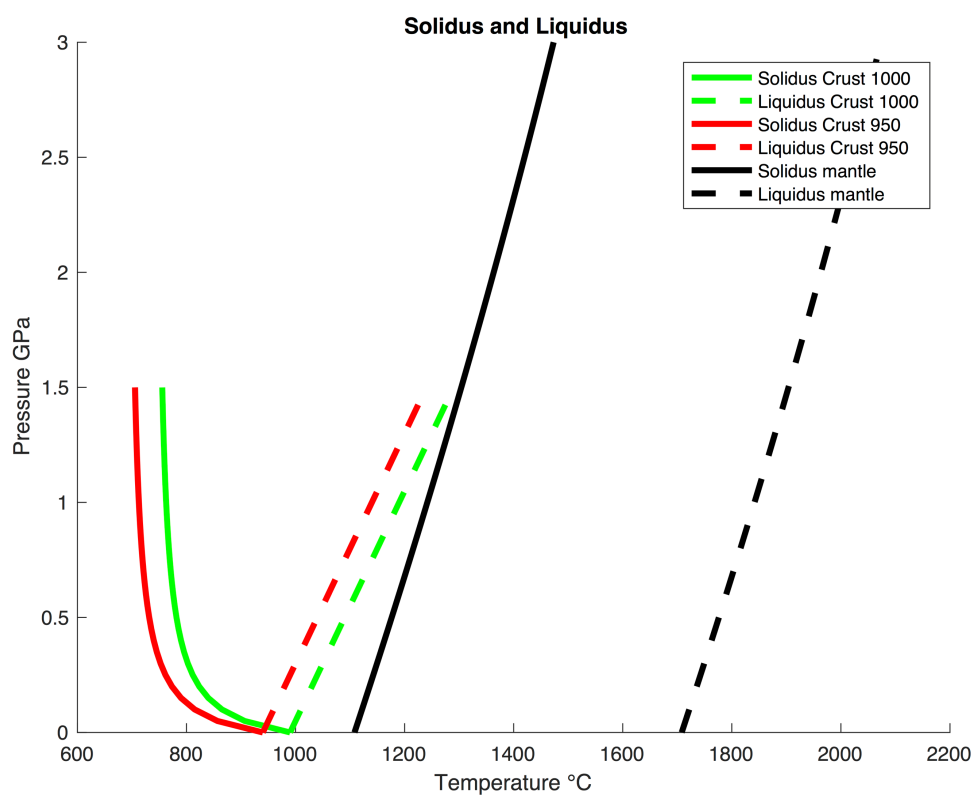

Figure A2: Solidus and liquidus as a function of pressure and temperature for mantle and crust (950 and 1000°C).
